# Supplementary material
Source: ML conference proceedings conference paper supplement (https://openreview.net/forum?id=aLUAzLDIOc)
Supplement: supplementary_material [file training_curve_47.pdf › arithmetic-rl-release/notebooks/plots/training_curve_47.pdf]

training\_curve\_47

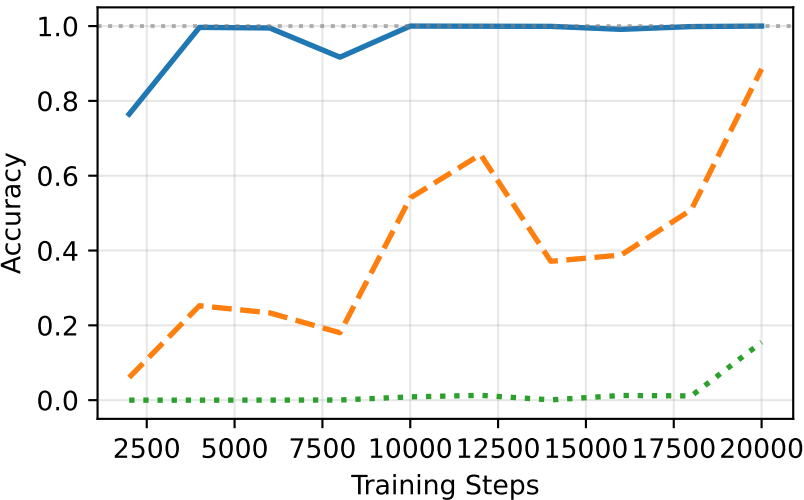

- In-Distribution ( $\text{len} \leq 16$ )
- - - Unseen len by main ( $16 < \text{len} \leq 32$ )
- ... Unseen len by both main & aux ( $\text{len} > 32$ )
