# Supplementary material
Source: ML conference proceedings conference paper supplement (https://openreview.net/forum?id=aLUAzLDIOc)

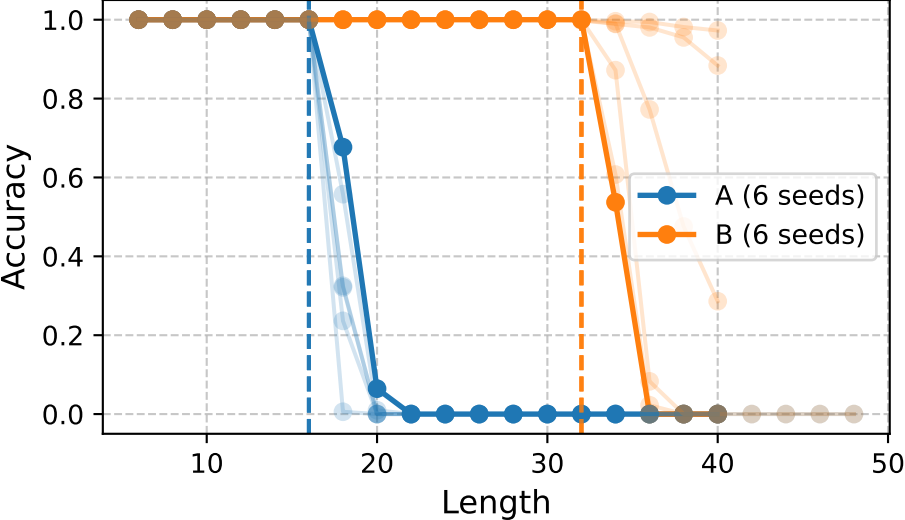

Supplement: supplementary_material [file copy_first_op-nano-llama.pdf › arithmetic-rl-release/notebooks/plots/addition/copy_first_op-nano-llama.pdf]

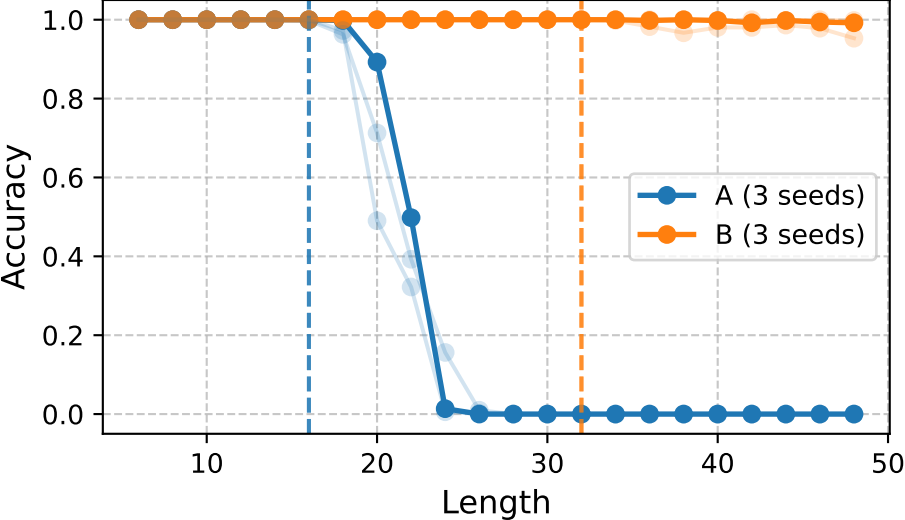

Supplement: supplementary_material [file copy_first_op-smollm-360m.pdf › arithmetic-rl-release/notebooks/plots/addition/copy_first_op-smollm-360m.pdf]

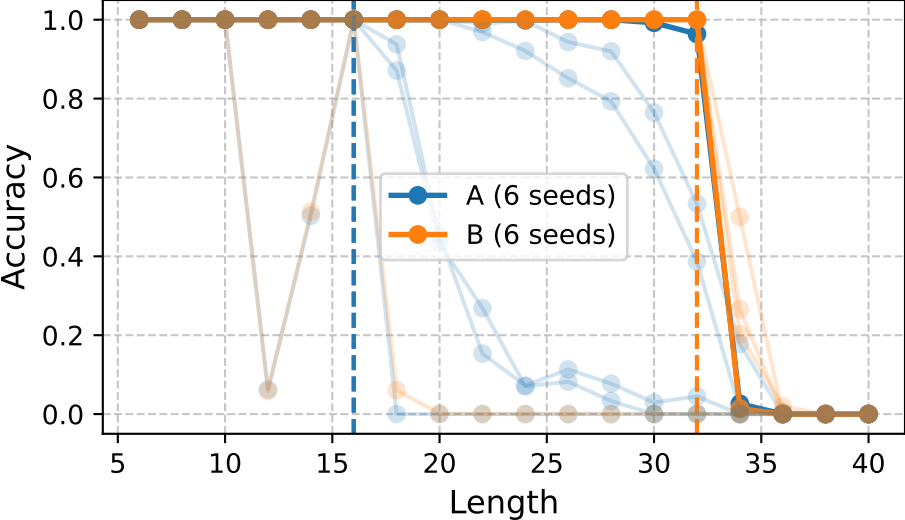

Supplement: supplementary_material [file no_carry-nano-llama.pdf › arithmetic-rl-release/notebooks/plots/addition/no_carry-nano-llama.pdf]

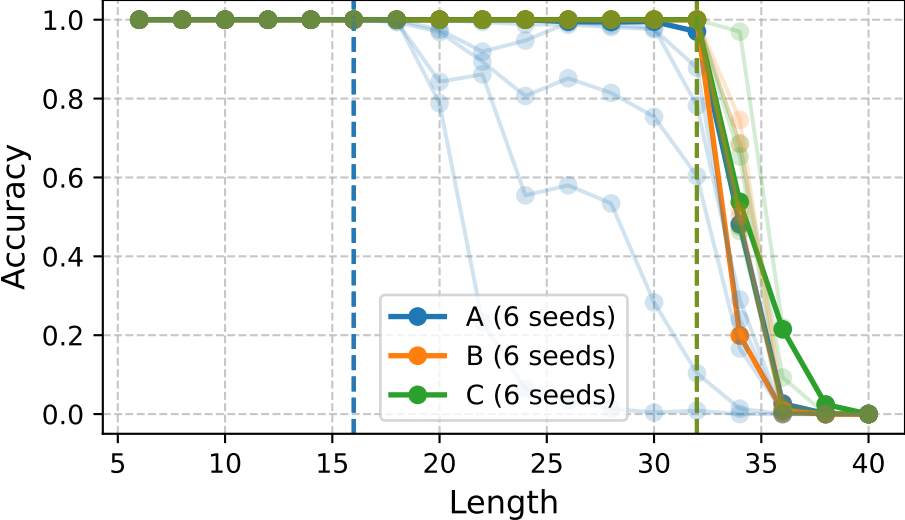

Supplement: supplementary_material [file no_carry_only_carry-nano-llama.pdf › arithmetic-rl-release/notebooks/plots/addition/no_carry_only_carry-nano-llama.pdf]

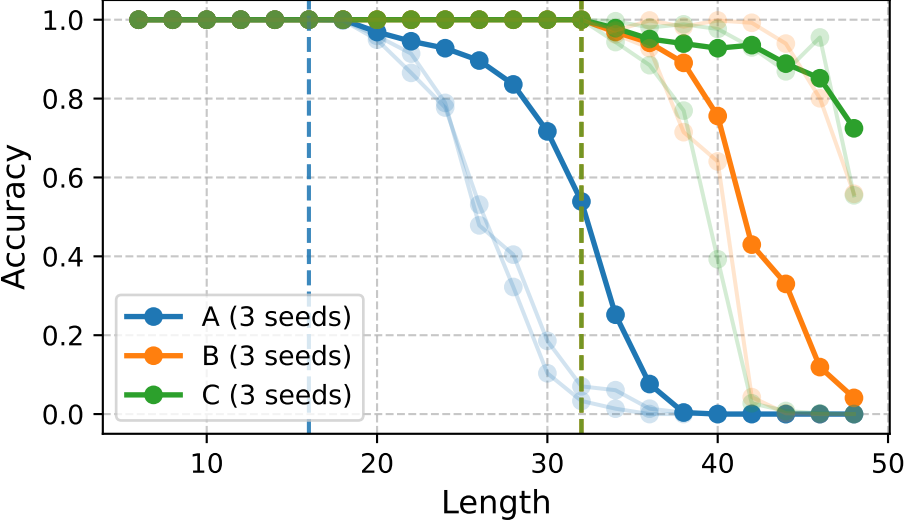

Supplement: supplementary_material [file no_carry_only_carry-smollm-360m.pdf › arithmetic-rl-release/notebooks/plots/addition/no_carry_only_carry-smollm-360m.pdf]

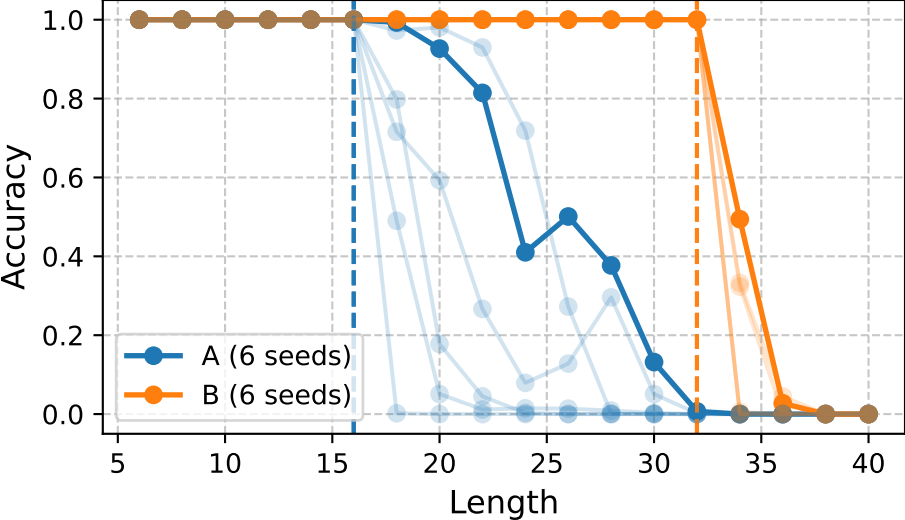

Supplement: supplementary_material [file only_carry-nano-llama.pdf › arithmetic-rl-release/notebooks/plots/addition/only_carry-nano-llama.pdf]

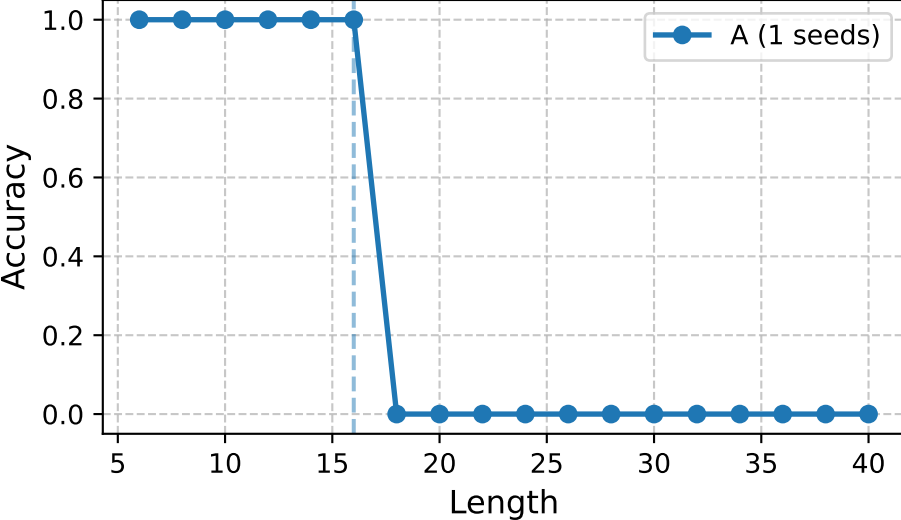

Supplement: supplementary_material [file reverse_add-nano-llama-grafting.pdf › arithmetic-rl-release/notebooks/plots/addition/reverse_add-nano-llama-grafting.pdf]

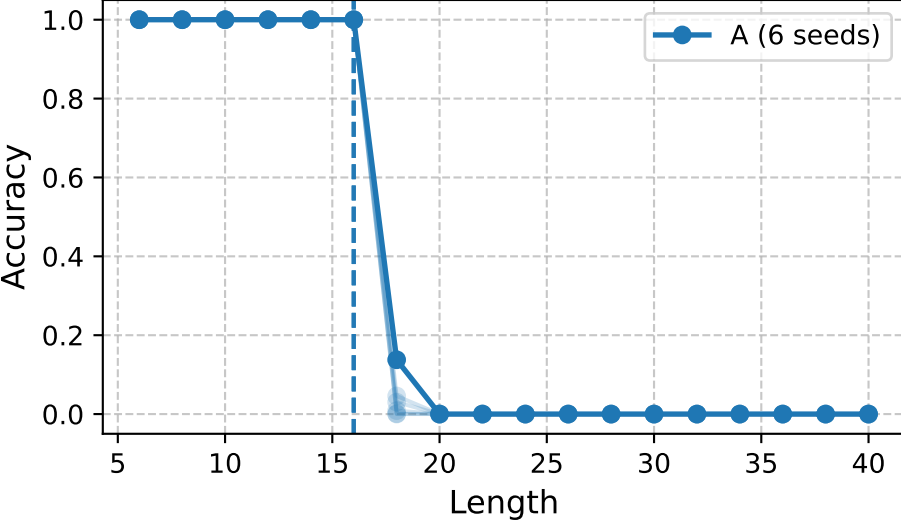

Supplement: supplementary_material [file reverse_add-nano-llama.pdf › arithmetic-rl-release/notebooks/plots/addition/reverse_add-nano-llama.pdf]

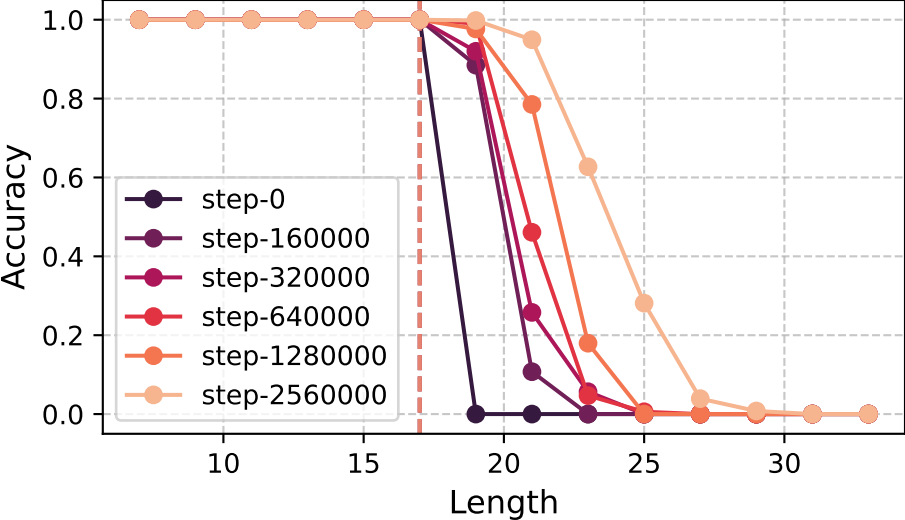

Supplement: supplementary_material [file reverse_add-scaling-config.revision.pdf › arithmetic-rl-release/notebooks/plots/addition/reverse_add-scaling-config.revision.pdf]

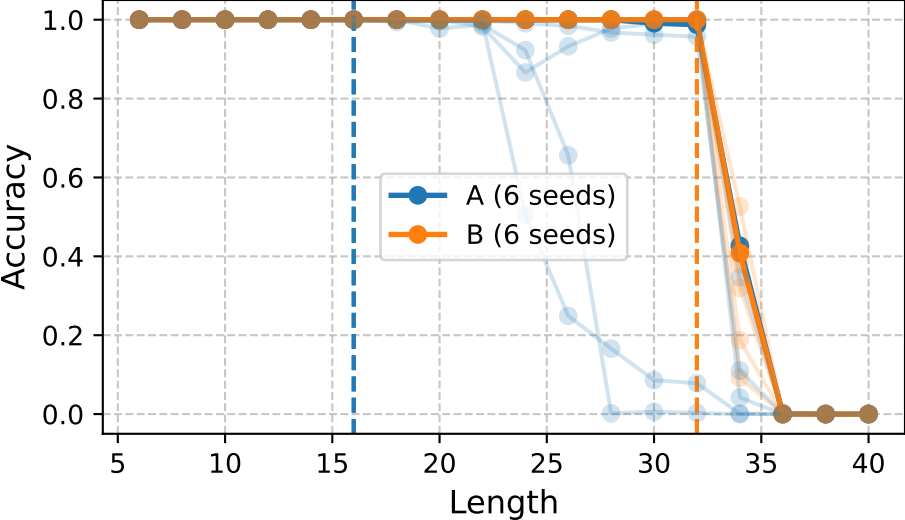

Supplement: supplementary_material [file reverse_add_trans-nano-llama.pdf › arithmetic-rl-release/notebooks/plots/addition/reverse_add_trans-nano-llama.pdf]

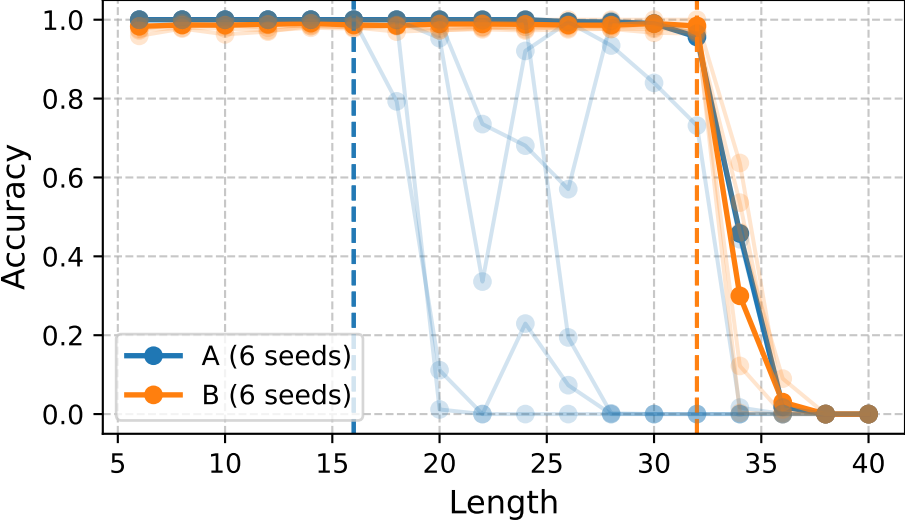

Supplement: supplementary_material [file reverse_sub-nano-llama.pdf › arithmetic-rl-release/notebooks/plots/addition/reverse_sub-nano-llama.pdf]

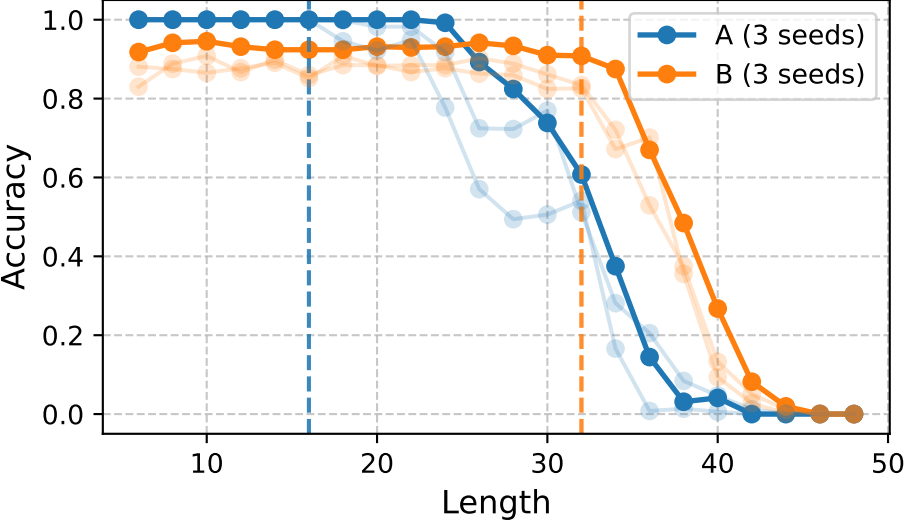

Supplement: supplementary_material [file reverse_sub-smollm-360m.pdf › arithmetic-rl-release/notebooks/plots/addition/reverse_sub-smollm-360m.pdf]

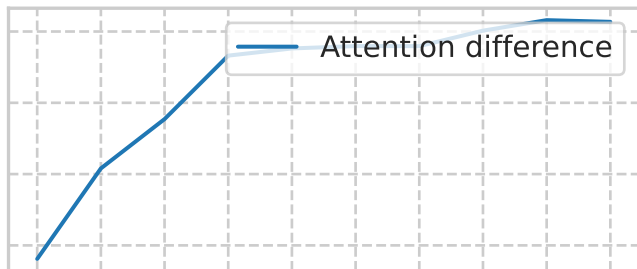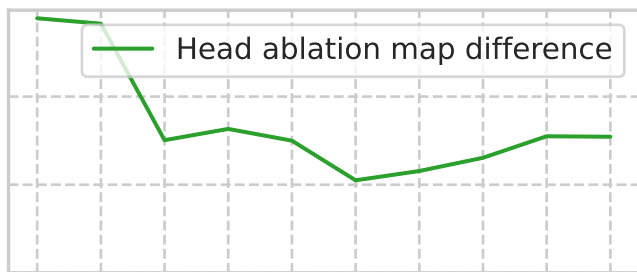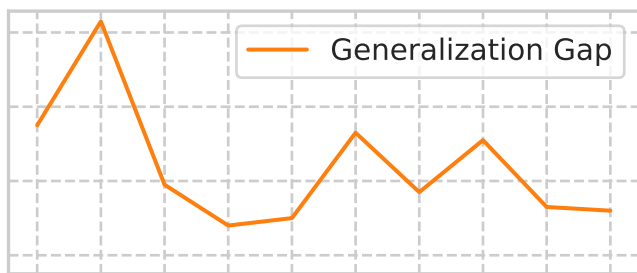

Checkpoint

Supplement: supplementary_material [file capitalize_reverse_capitalize.pdf › arithmetic-rl-release/notebooks/plots/analysis/capitalize_reverse_capitalize.pdf]

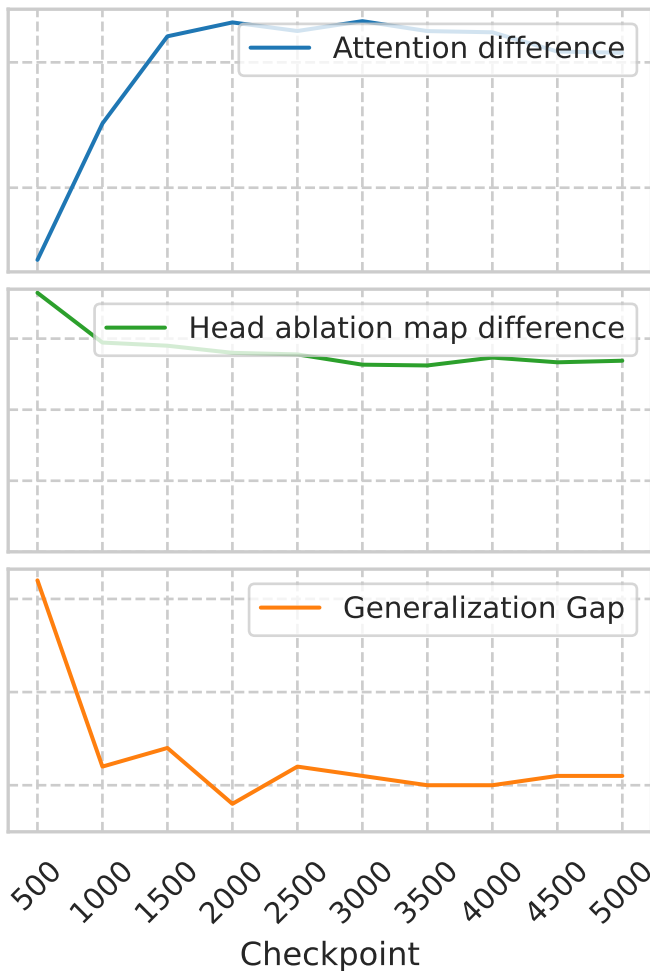

Supplement: supplementary_material [file copy_MQAR.pdf › arithmetic-rl-release/notebooks/plots/analysis/copy_MQAR.pdf]

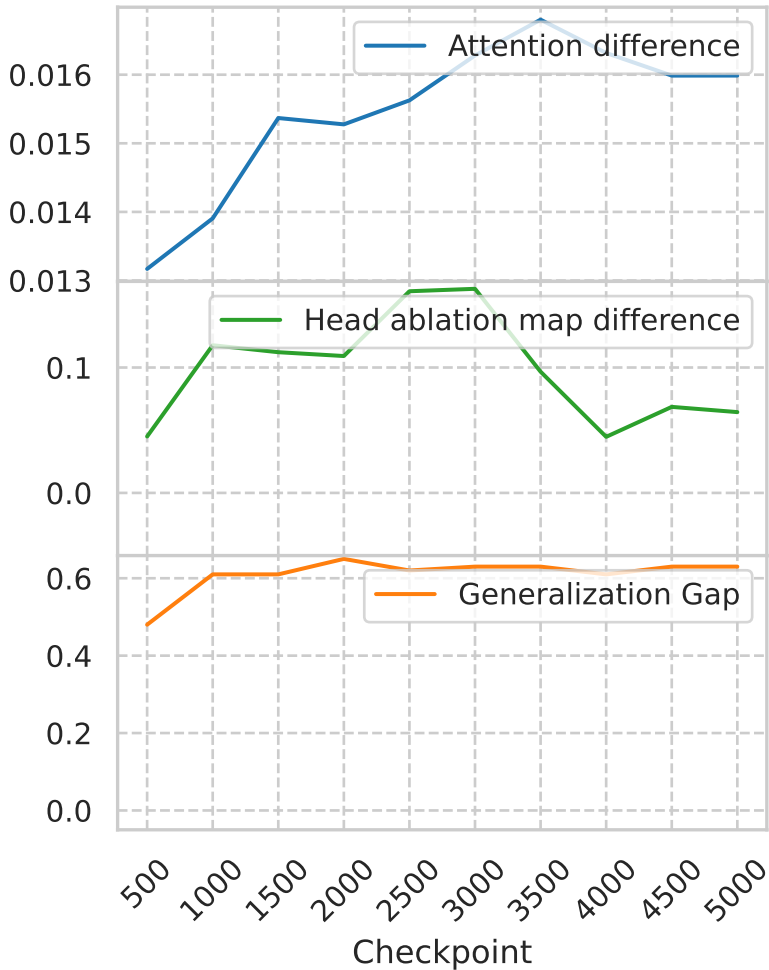

Supplement: supplementary_material [file copy_reverse.pdf › arithmetic-rl-release/notebooks/plots/analysis/copy_reverse.pdf]

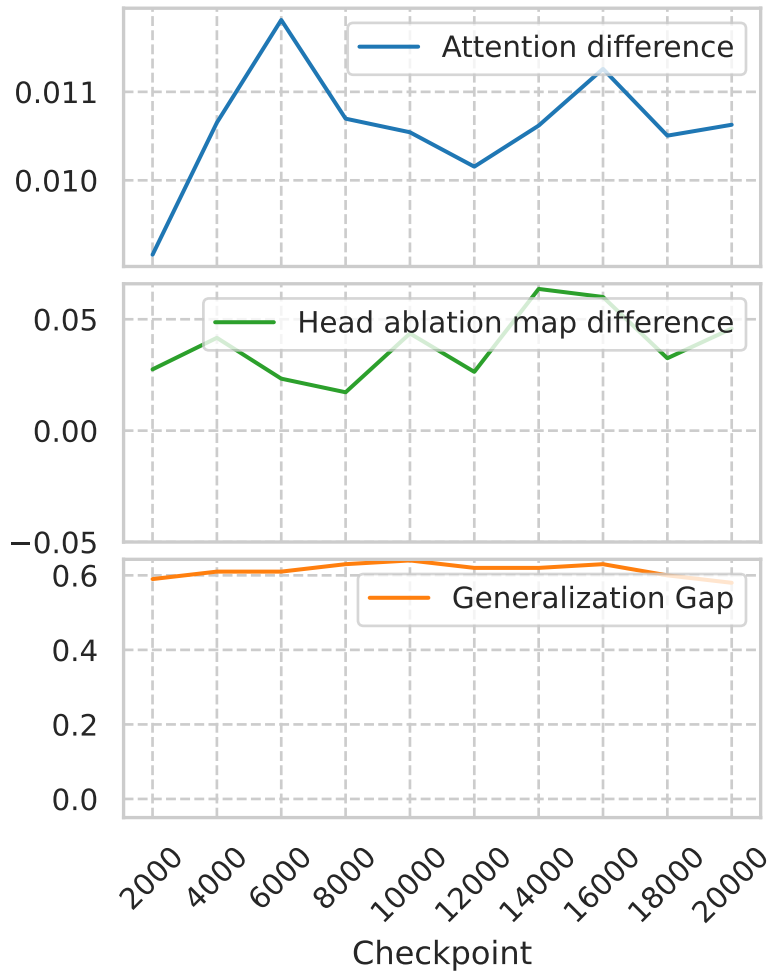

Supplement: supplementary_material [file reverse_add_copy_first_op.pdf › arithmetic-rl-release/notebooks/plots/analysis/reverse_add_copy_first_op.pdf]

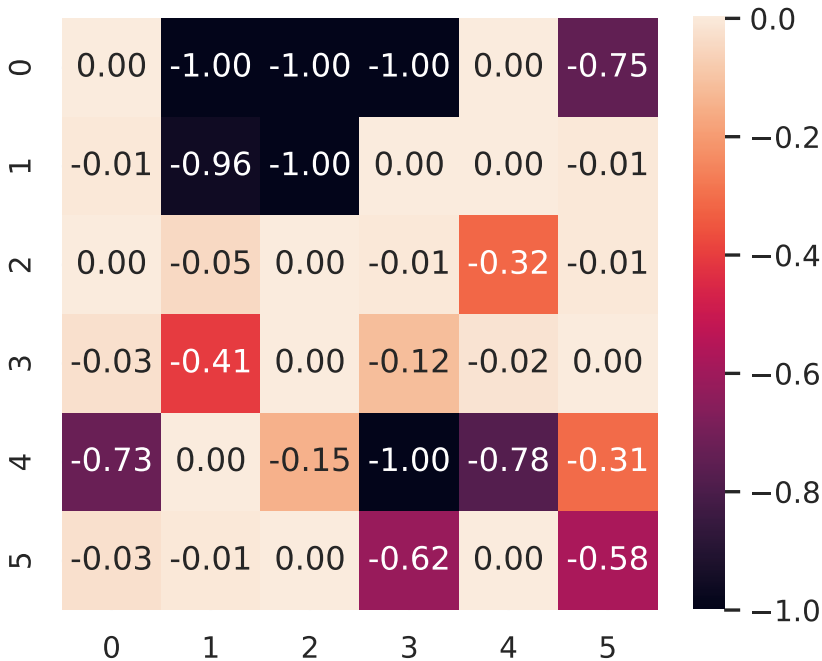

Supplement: supplementary_material [file reverse_add_reverse_sub.pdf › arithmetic-rl-release/notebooks/plots/analysis/reverse_add_reverse_sub.pdf]

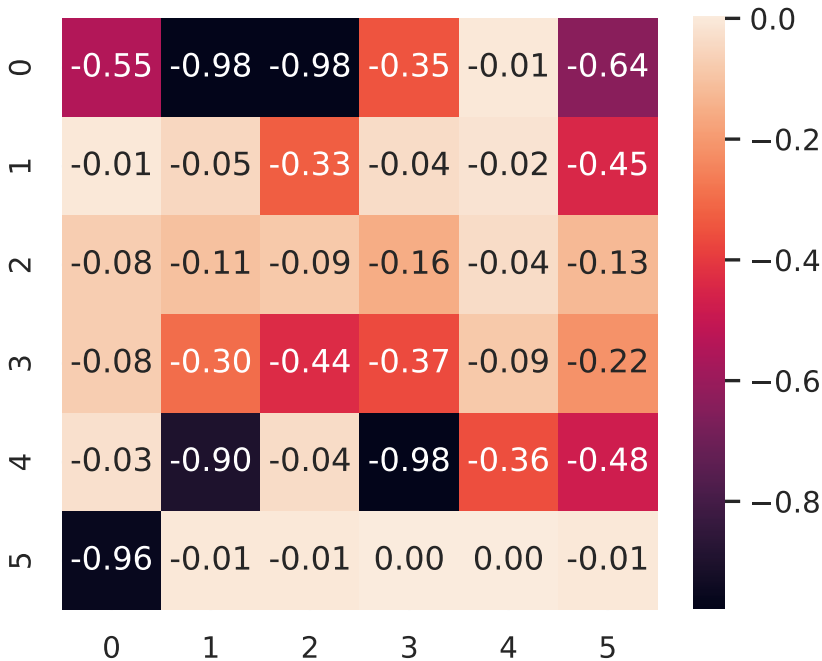

Supplement: supplementary_material [file ablation_A_10000.pdf › arithmetic-rl-release/notebooks/plots/analysis/tmp/ablation_A_10000.pdf]

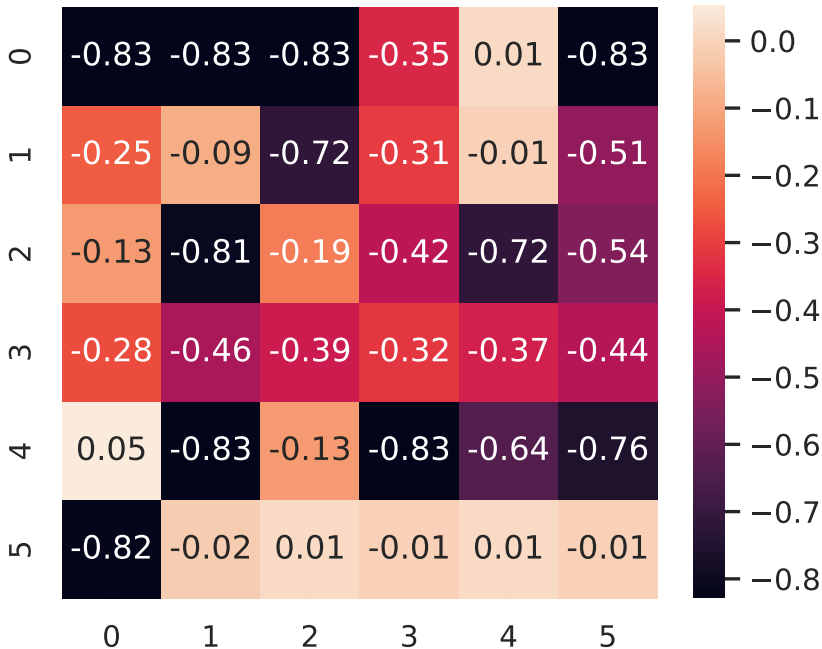

Supplement: supplementary_material [file ablation_A_12000.pdf › arithmetic-rl-release/notebooks/plots/analysis/tmp/ablation_A_12000.pdf]

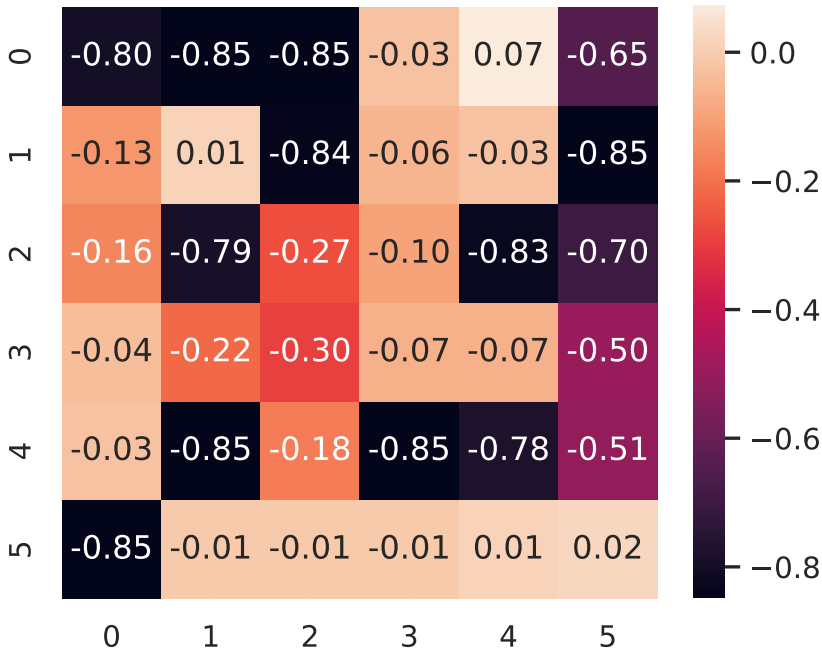

Supplement: supplementary_material [file ablation_A_14000.pdf › arithmetic-rl-release/notebooks/plots/analysis/tmp/ablation_A_14000.pdf]

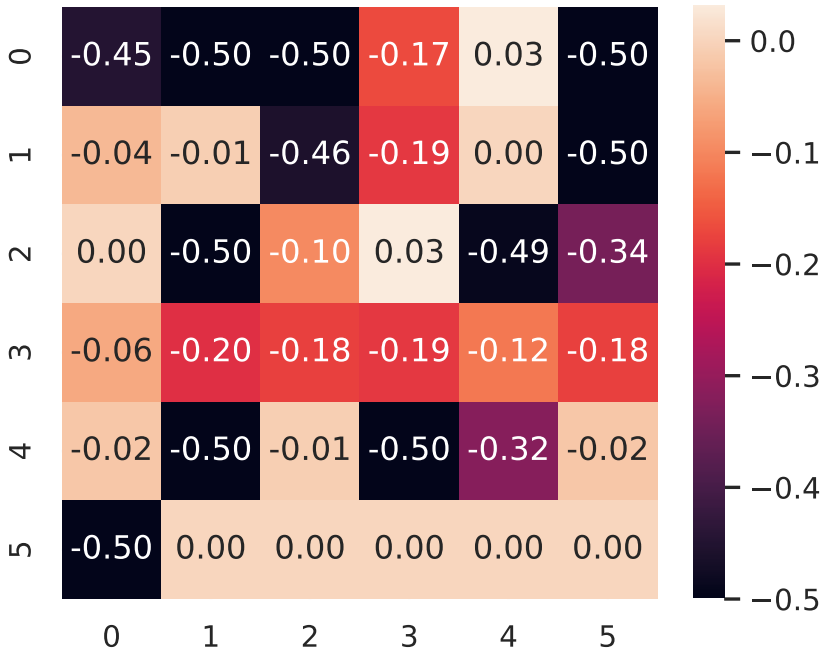

Supplement: supplementary_material [file ablation_A_16000.pdf › arithmetic-rl-release/notebooks/plots/analysis/tmp/ablation_A_16000.pdf]

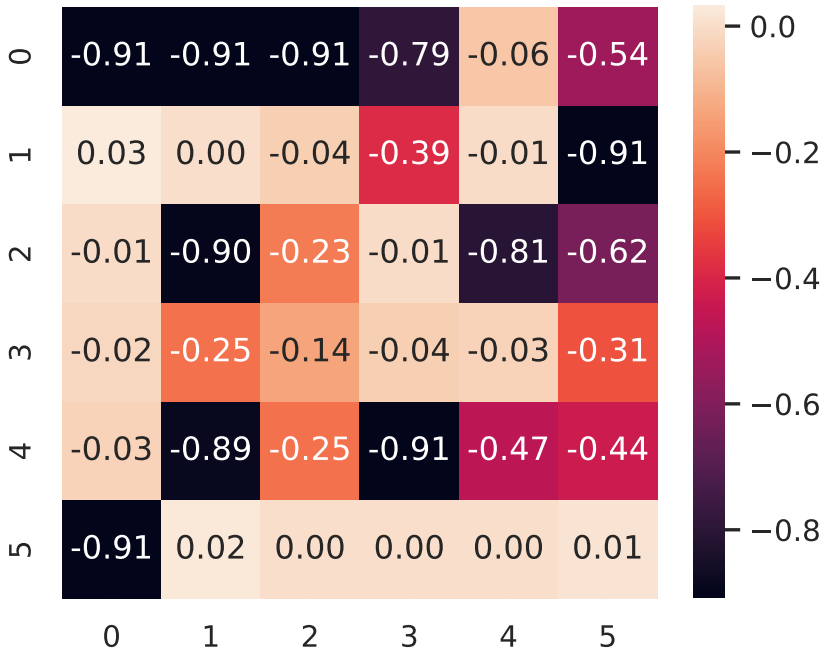

Supplement: supplementary_material [file ablation_A_18000.pdf › arithmetic-rl-release/notebooks/plots/analysis/tmp/ablation_A_18000.pdf]

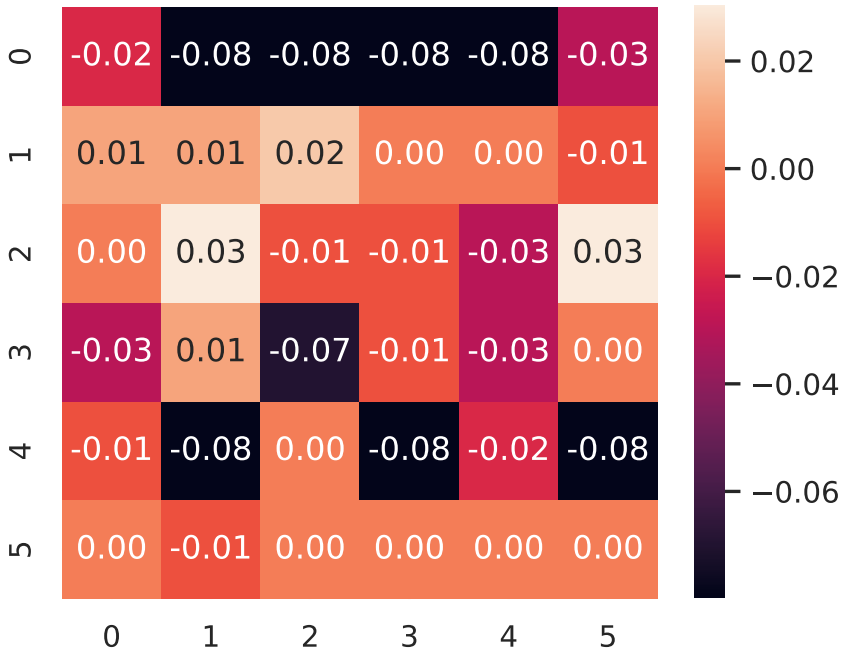

Supplement: supplementary_material [file ablation_A_2000.pdf › arithmetic-rl-release/notebooks/plots/analysis/tmp/ablation_A_2000.pdf]

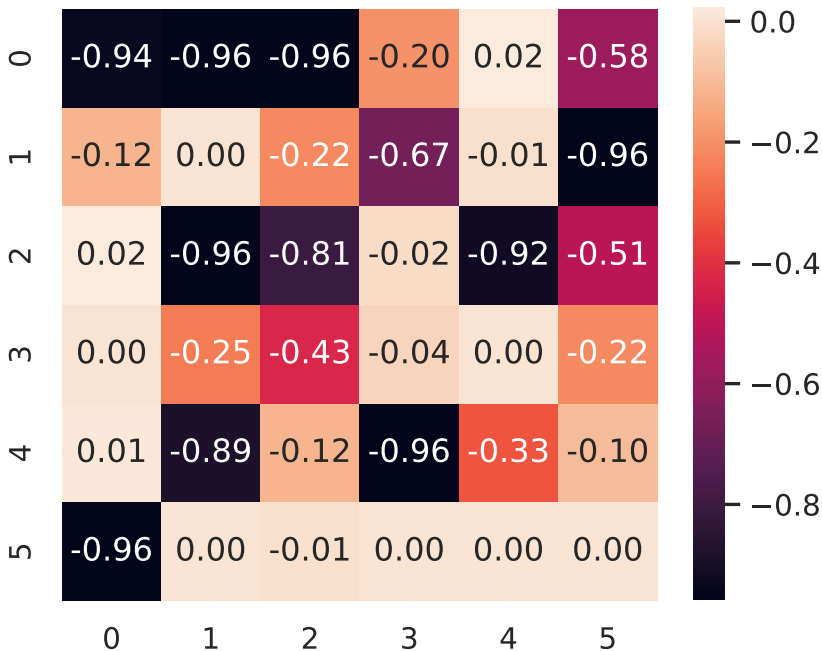

Supplement: supplementary_material [file ablation_A_20000.pdf › arithmetic-rl-release/notebooks/plots/analysis/tmp/ablation_A_20000.pdf]

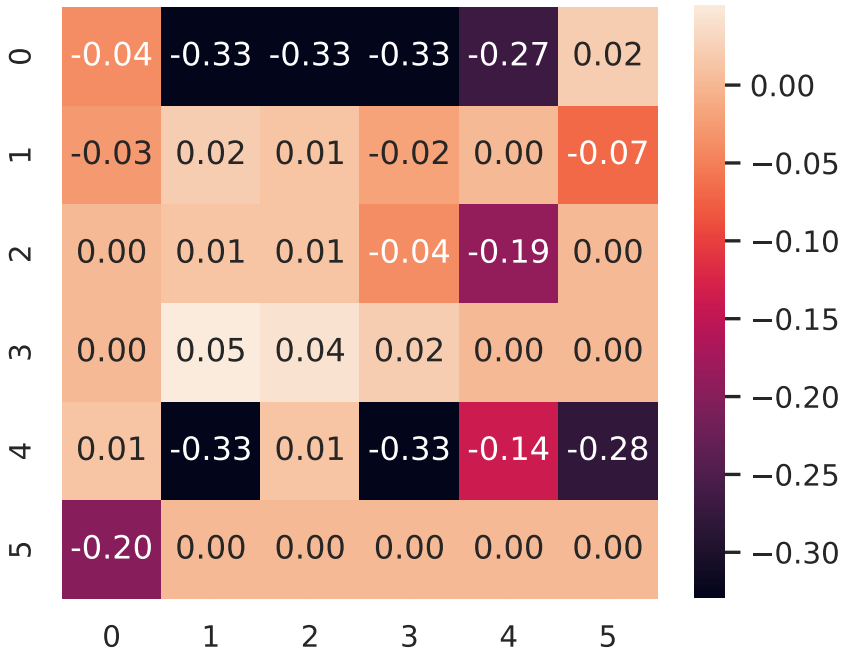

Supplement: supplementary_material [file ablation_A_4000.pdf › arithmetic-rl-release/notebooks/plots/analysis/tmp/ablation_A_4000.pdf]

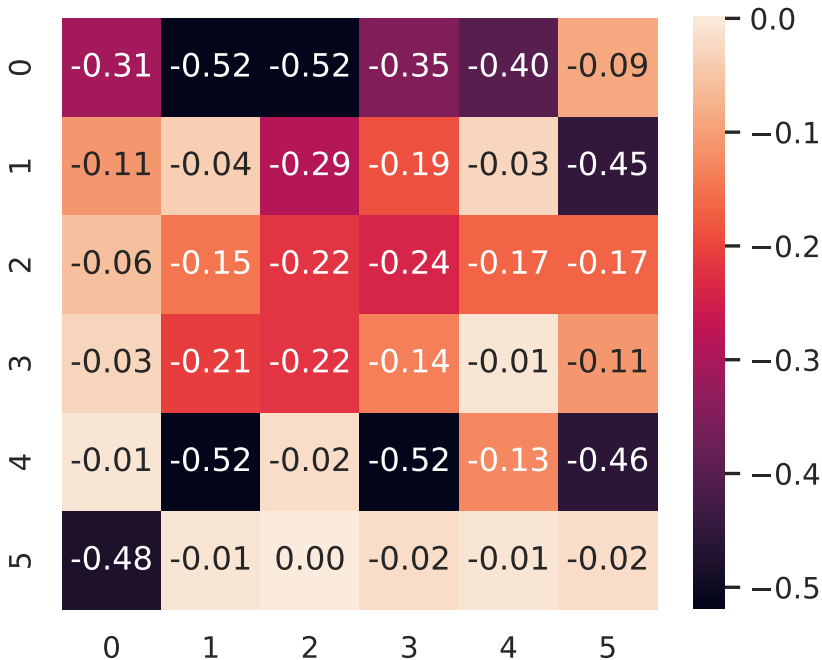

Supplement: supplementary_material [file ablation_A_6000.pdf › arithmetic-rl-release/notebooks/plots/analysis/tmp/ablation_A_6000.pdf]

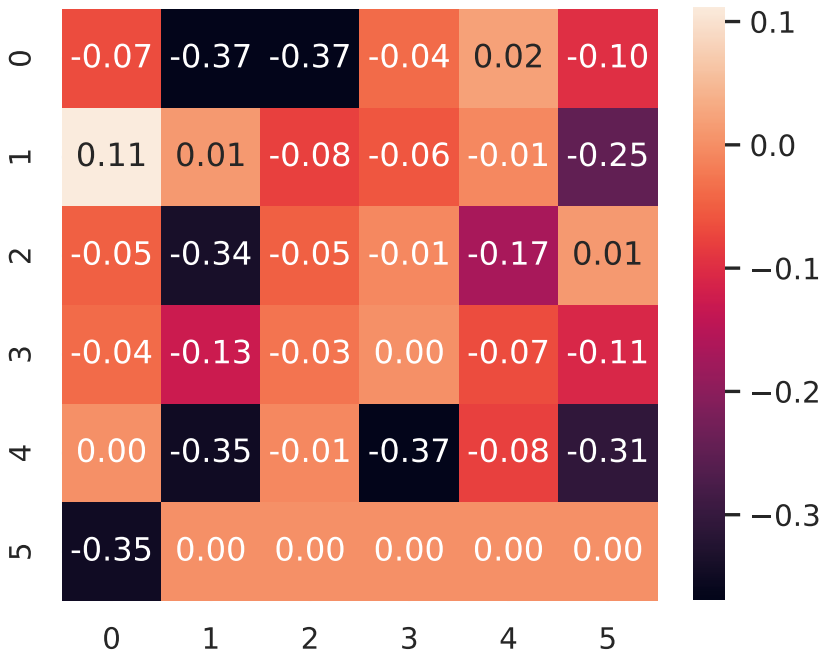

Supplement: supplementary_material [file ablation_A_8000.pdf › arithmetic-rl-release/notebooks/plots/analysis/tmp/ablation_A_8000.pdf]

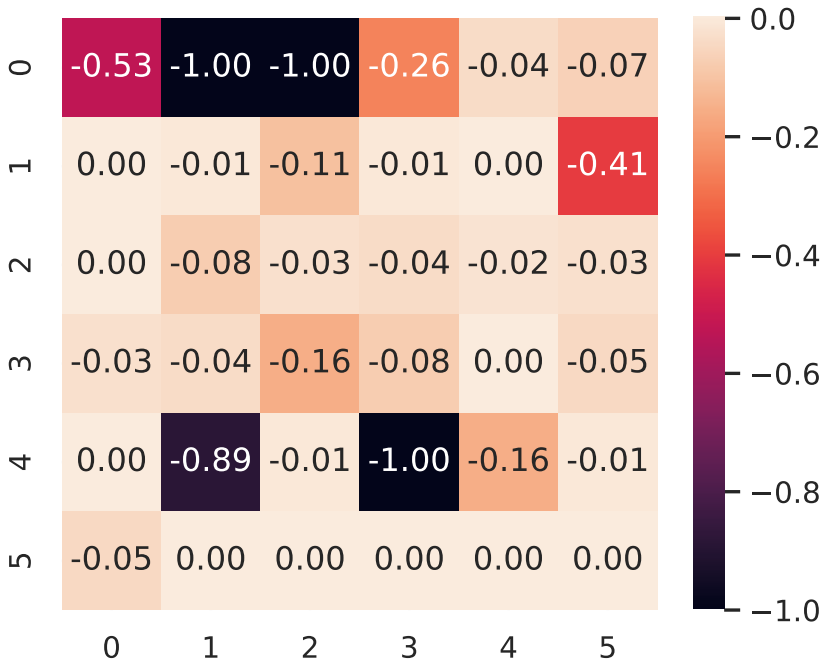

Supplement: supplementary_material [file ablation_B_10000.pdf › arithmetic-rl-release/notebooks/plots/analysis/tmp/ablation_B_10000.pdf]

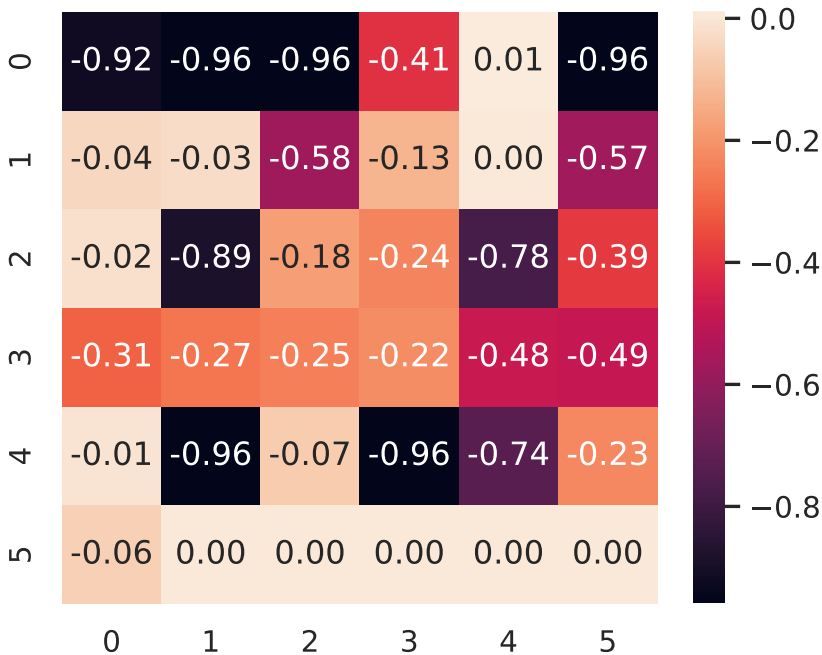

Supplement: supplementary_material [file ablation_B_12000.pdf › arithmetic-rl-release/notebooks/plots/analysis/tmp/ablation_B_12000.pdf]

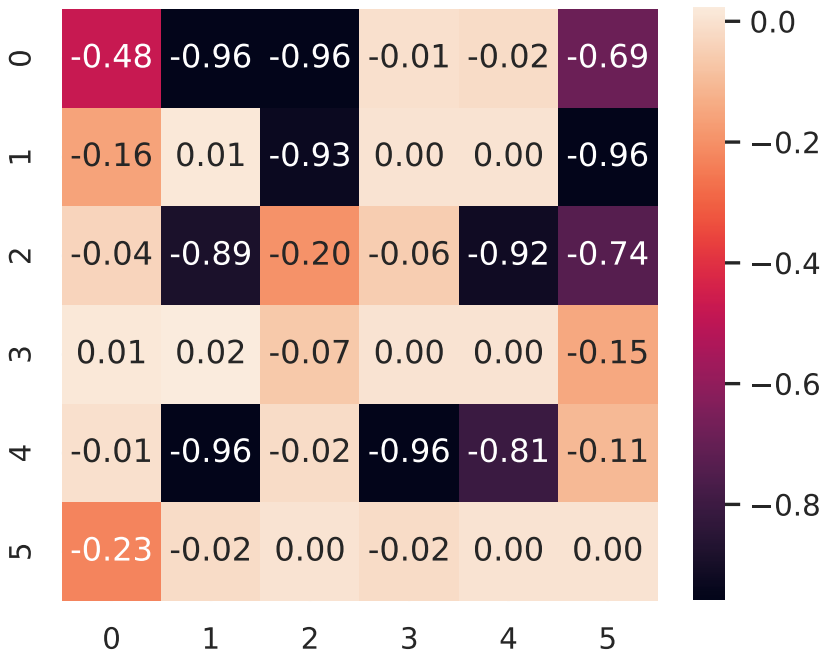

Supplement: supplementary_material [file ablation_B_14000.pdf › arithmetic-rl-release/notebooks/plots/analysis/tmp/ablation_B_14000.pdf]

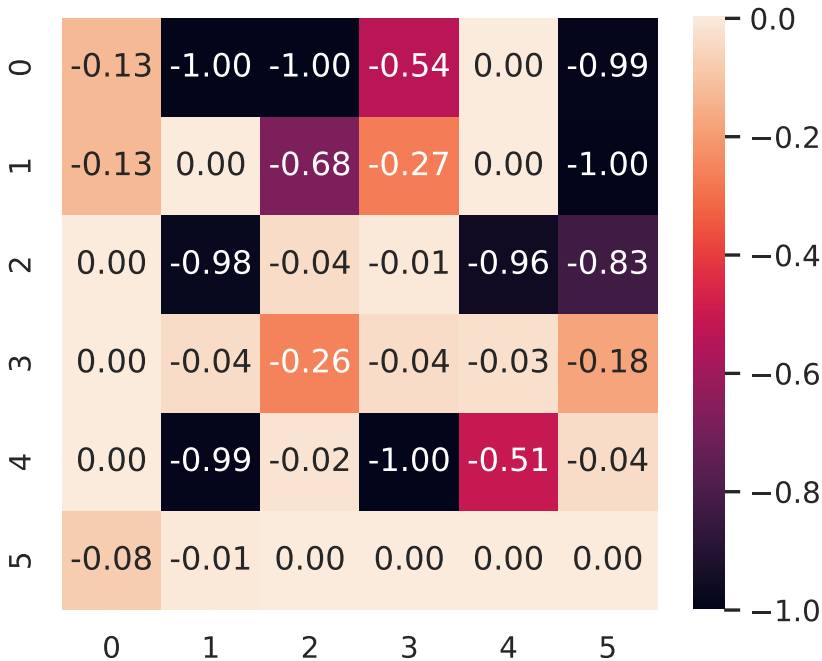

Supplement: supplementary_material [file ablation_B_16000.pdf › arithmetic-rl-release/notebooks/plots/analysis/tmp/ablation_B_16000.pdf]

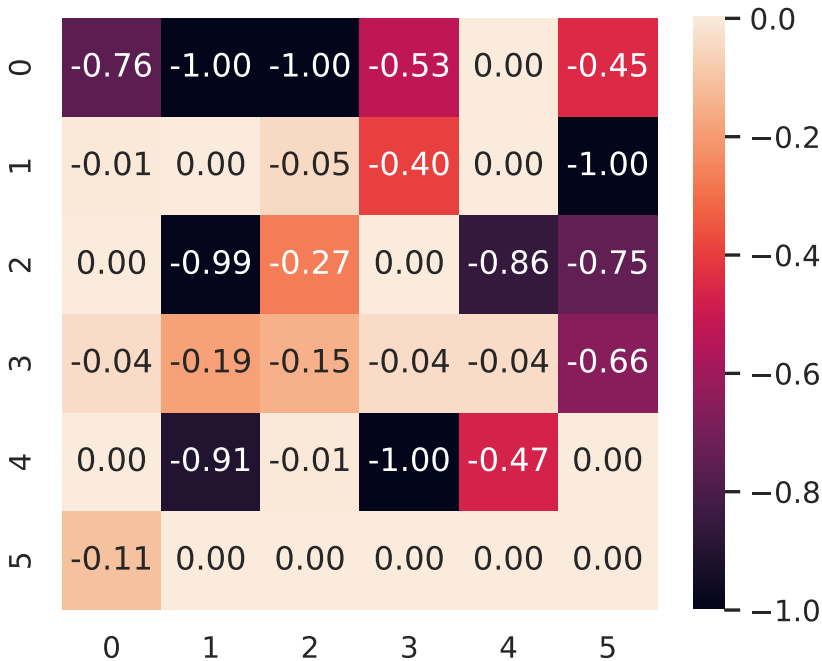

Supplement: supplementary_material [file ablation_B_18000.pdf › arithmetic-rl-release/notebooks/plots/analysis/tmp/ablation_B_18000.pdf]

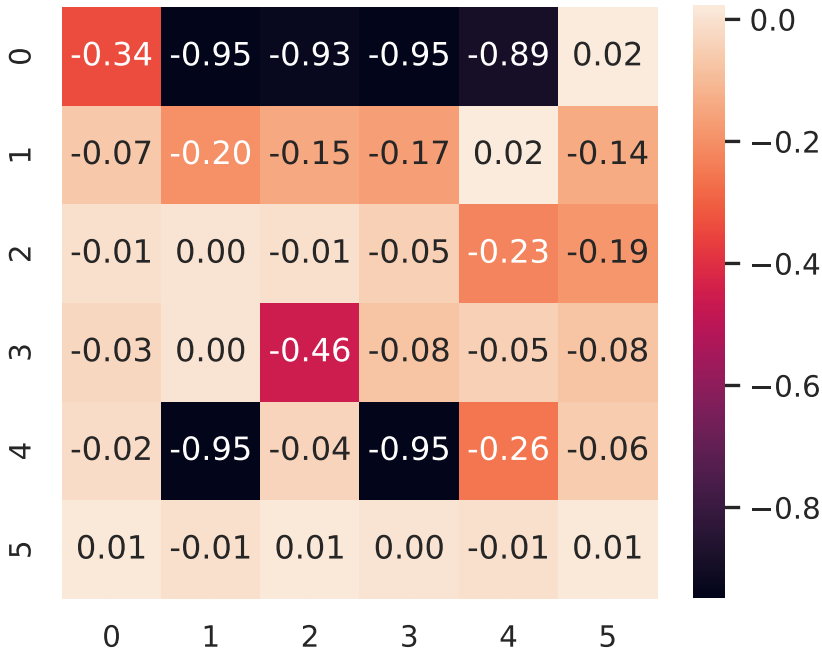

Supplement: supplementary_material [file ablation_B_2000.pdf › arithmetic-rl-release/notebooks/plots/analysis/tmp/ablation_B_2000.pdf]

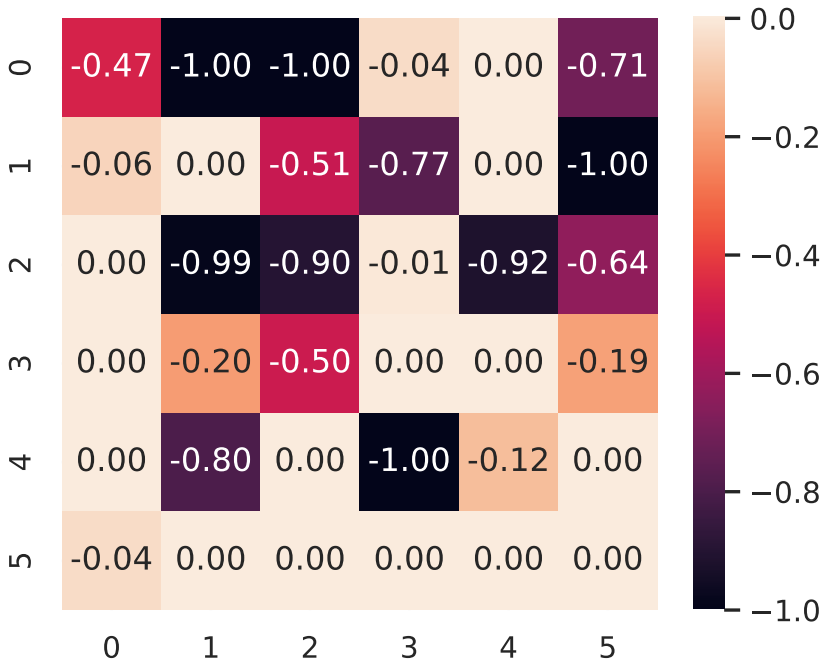

Supplement: supplementary_material [file ablation_B_20000.pdf › arithmetic-rl-release/notebooks/plots/analysis/tmp/ablation_B_20000.pdf]

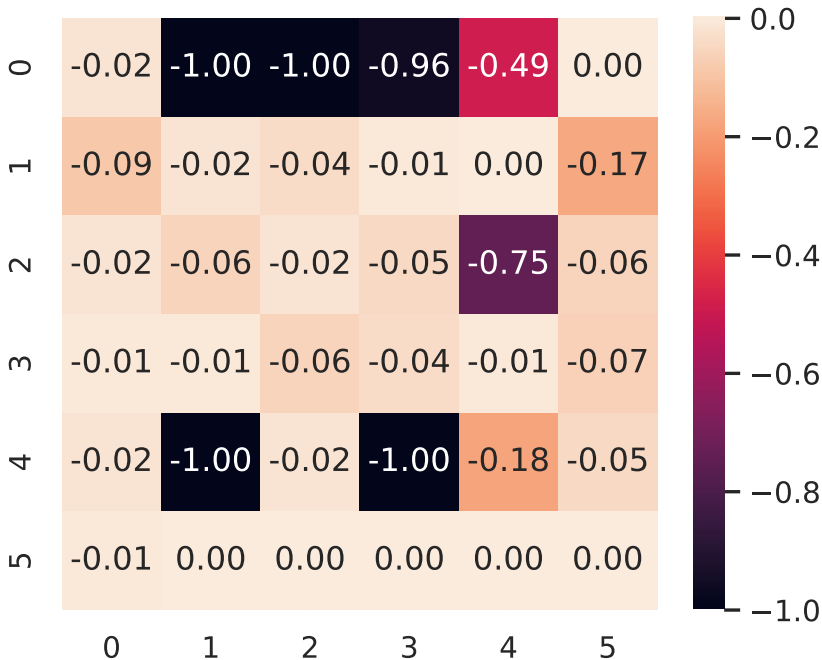

Supplement: supplementary_material [file ablation_B_4000.pdf › arithmetic-rl-release/notebooks/plots/analysis/tmp/ablation_B_4000.pdf]

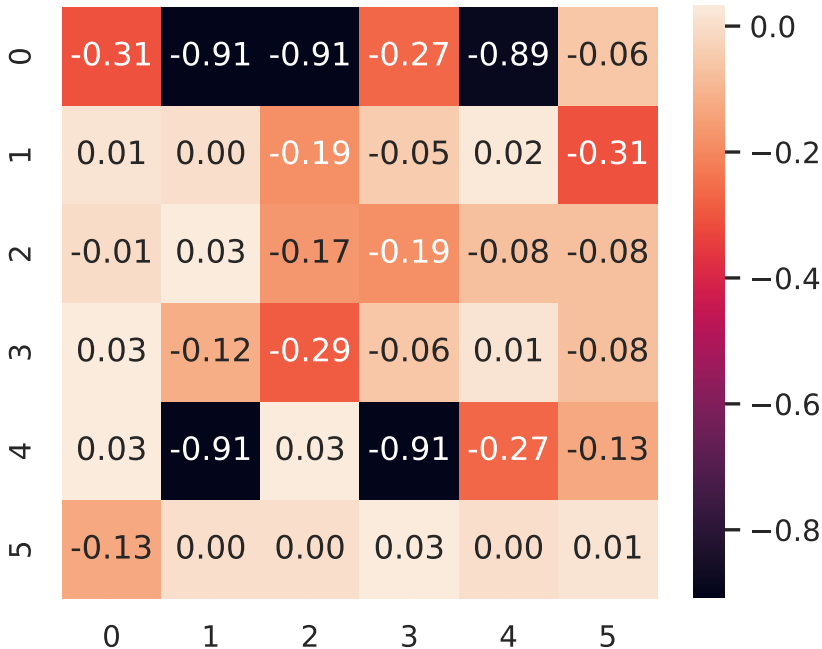

Supplement: supplementary_material [file ablation_B_6000.pdf › arithmetic-rl-release/notebooks/plots/analysis/tmp/ablation_B_6000.pdf]

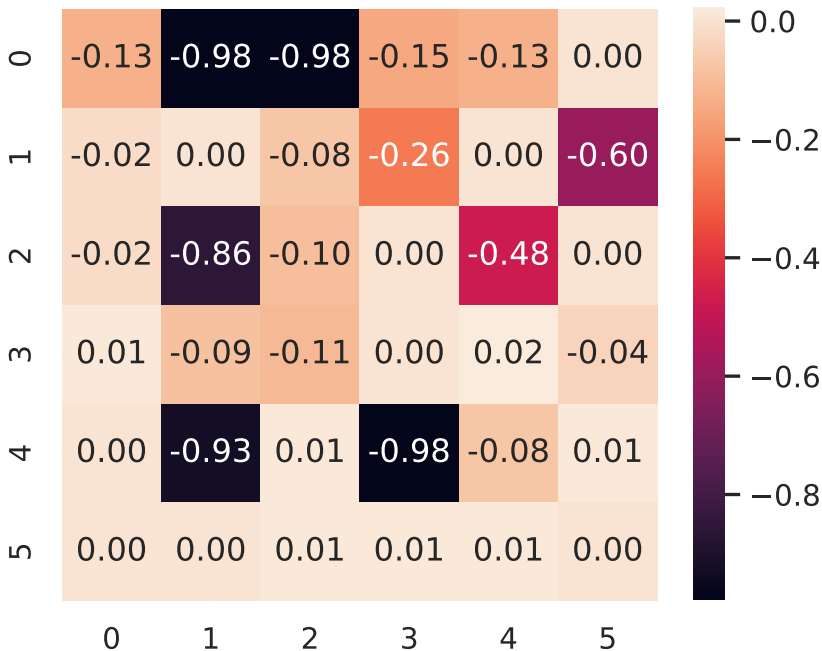

Supplement: supplementary_material [file ablation_B_8000.pdf › arithmetic-rl-release/notebooks/plots/analysis/tmp/ablation_B_8000.pdf]

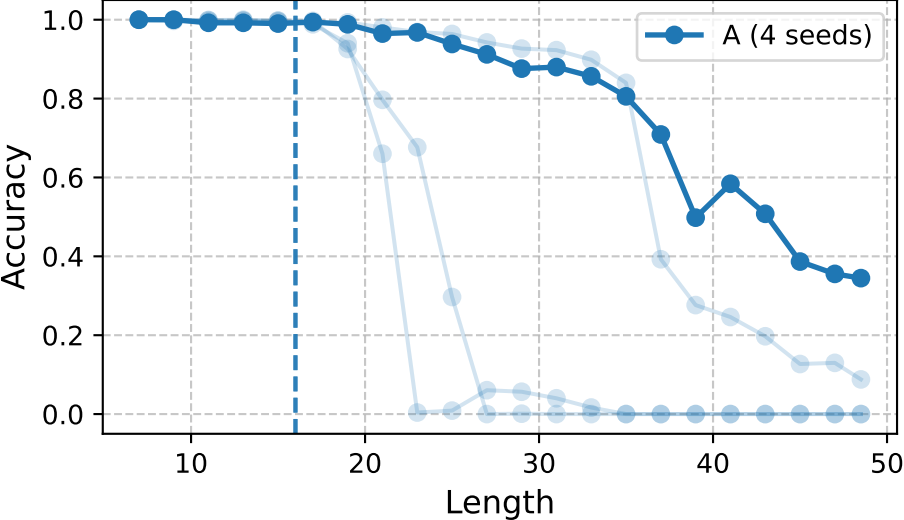

Supplement: supplementary_material [file capitalize_reverse-nano-llama-grafting.pdf › arithmetic-rl-release/notebooks/plots/copy/capitalize_reverse-nano-llama-grafting.pdf]

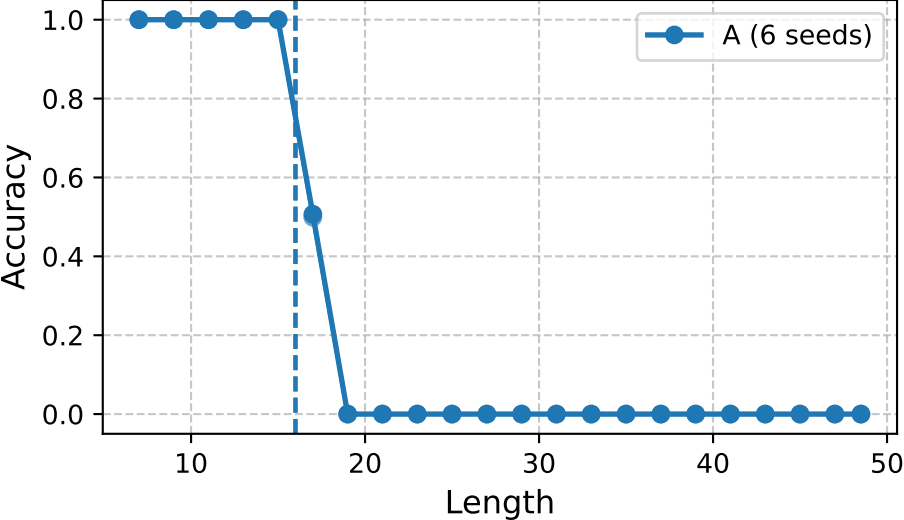

Supplement: supplementary_material [file copy-nano-llama.pdf › arithmetic-rl-release/notebooks/plots/copy/copy-nano-llama.pdf]

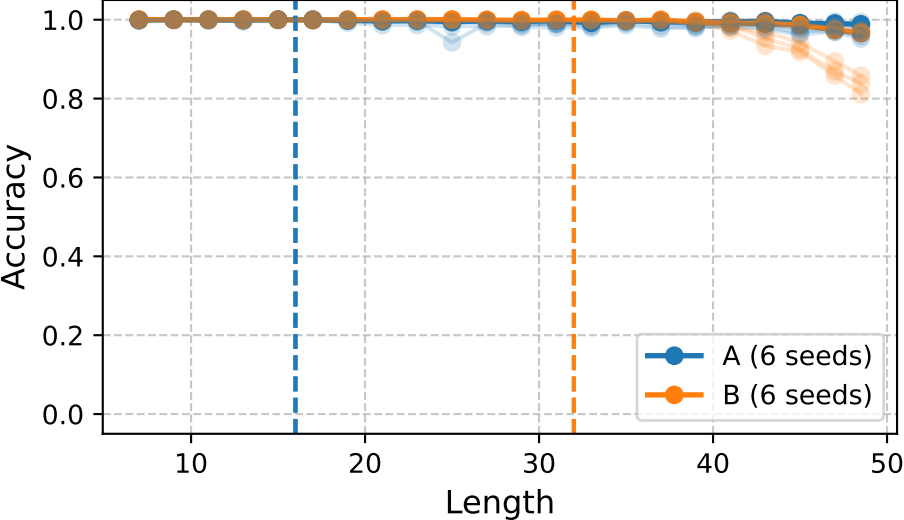

Supplement: supplementary_material [file copy_MQAR-nano-llama.pdf › arithmetic-rl-release/notebooks/plots/copy/copy_MQAR-nano-llama.pdf]

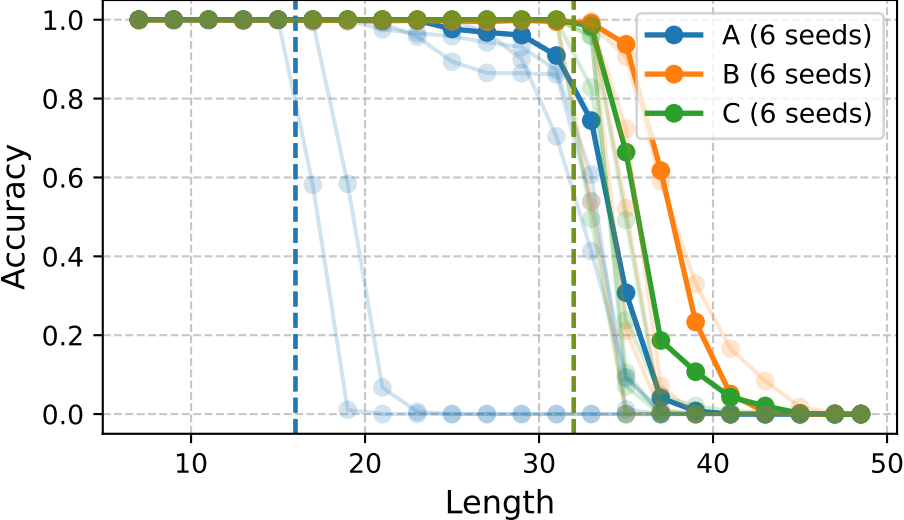

Supplement: supplementary_material [file copy_capitalize_reverse-nano-llama.pdf › arithmetic-rl-release/notebooks/plots/copy/copy_capitalize_reverse-nano-llama.pdf]

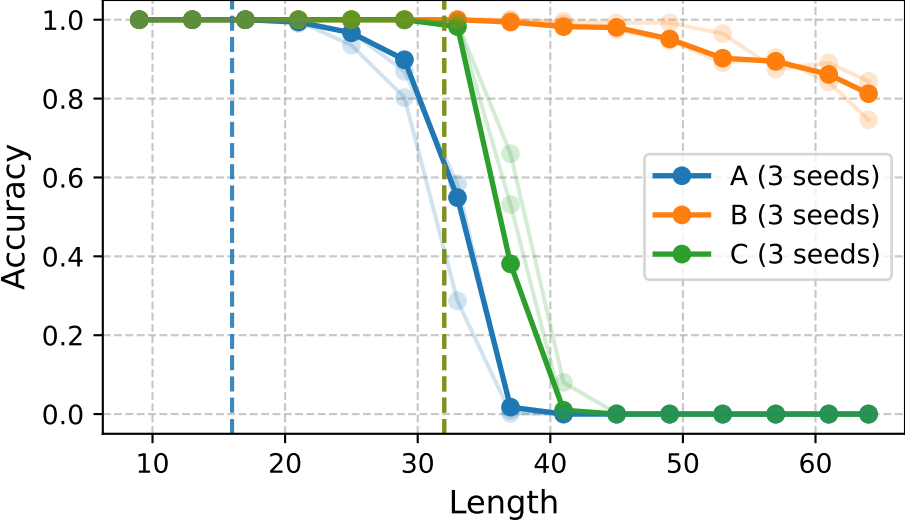

Supplement: supplementary_material [file copy_capitalize_reverse-smollm-360m.pdf › arithmetic-rl-release/notebooks/plots/copy/copy_capitalize_reverse-smollm-360m.pdf]

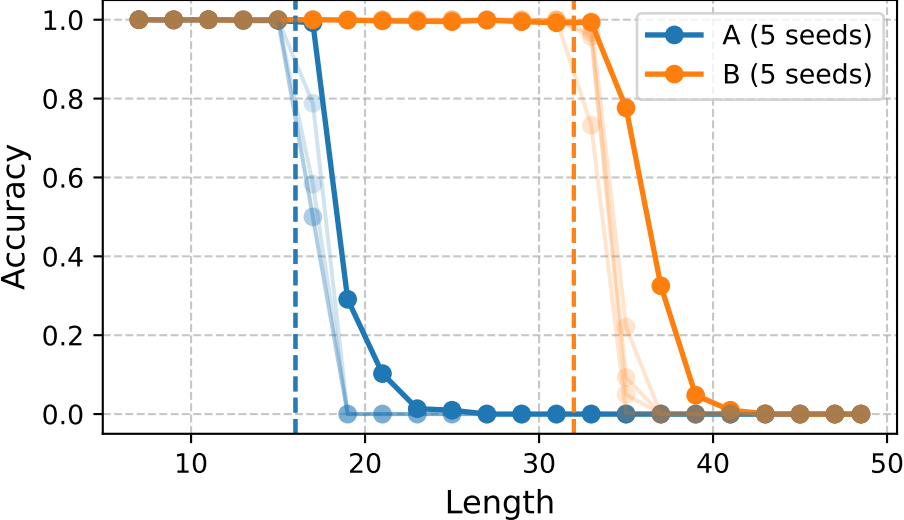

Supplement: supplementary_material [file copy_capitalize_reverse_capitalize-nano-llama.pdf › arithmetic-rl-release/notebooks/plots/copy/copy_capitalize_reverse_capitalize-nano-llama.pdf]

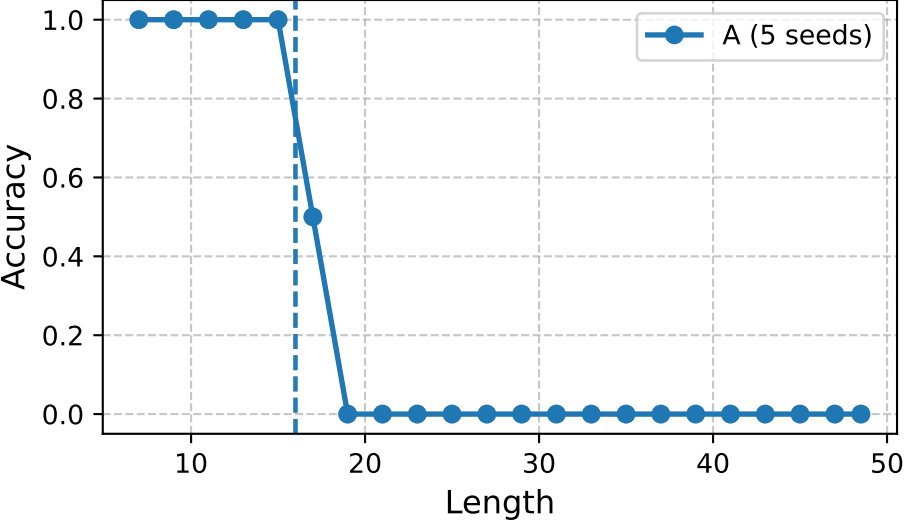

Supplement: supplementary_material [file copy_capitalize_reverse_control-nano-llama.pdf › arithmetic-rl-release/notebooks/plots/copy/copy_capitalize_reverse_control-nano-llama.pdf]

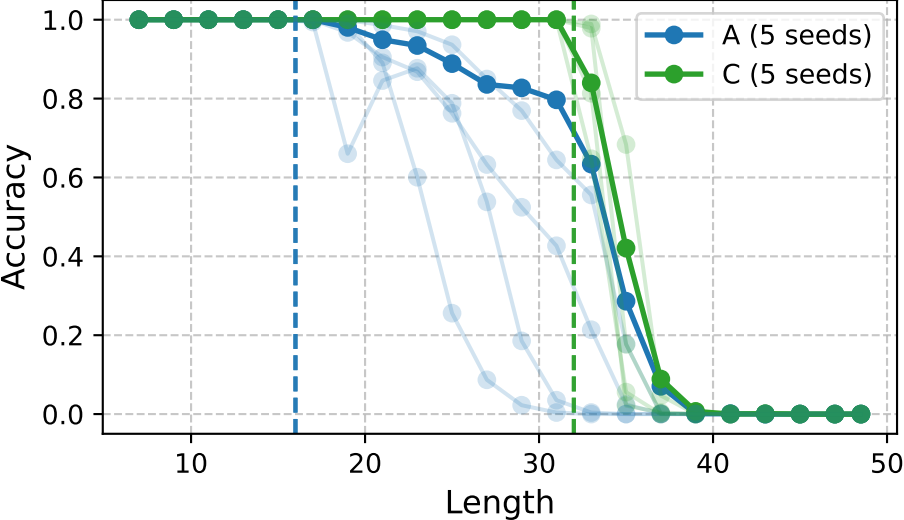

Supplement: supplementary_material [file copy_capitalize_reverse_reverse-nano-llama.pdf › arithmetic-rl-release/notebooks/plots/copy/copy_capitalize_reverse_reverse-nano-llama.pdf]

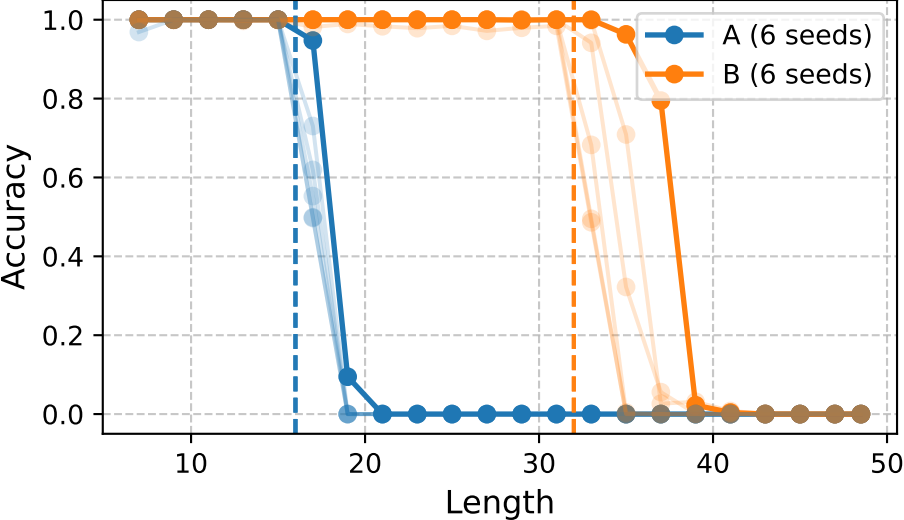

Supplement: supplementary_material [file copy_reverse-nano-llama.pdf › arithmetic-rl-release/notebooks/plots/copy/copy_reverse-nano-llama.pdf]

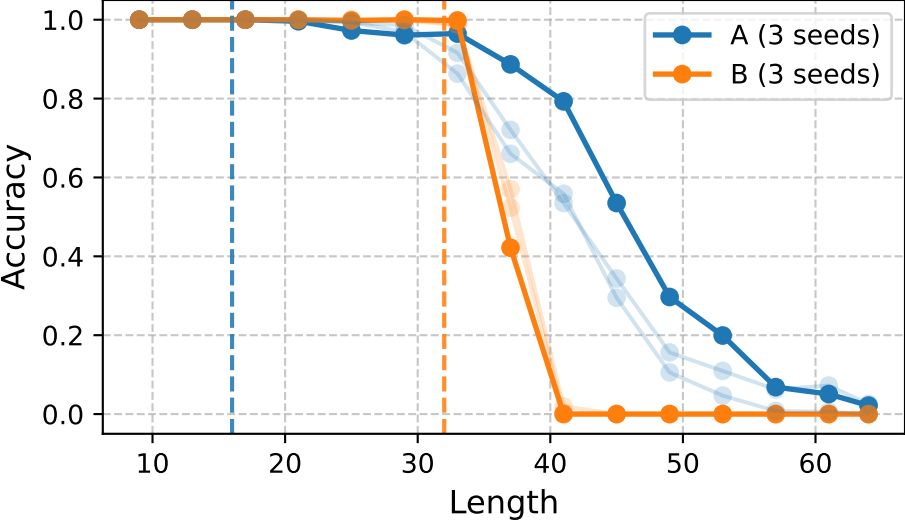

Supplement: supplementary_material [file copy_reverse-smollm-360m.pdf › arithmetic-rl-release/notebooks/plots/copy/copy_reverse-smollm-360m.pdf]

**Generalization Gap**

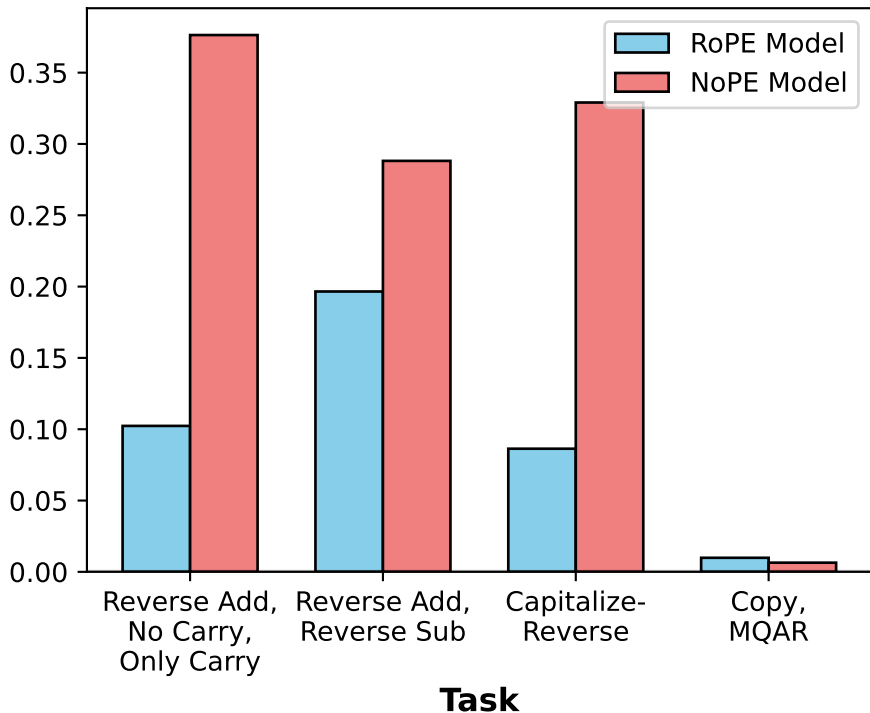

Supplement: supplementary_material [file gen_gap_comparison.pdf › arithmetic-rl-release/notebooks/plots/gen_gap_comparison.pdf]

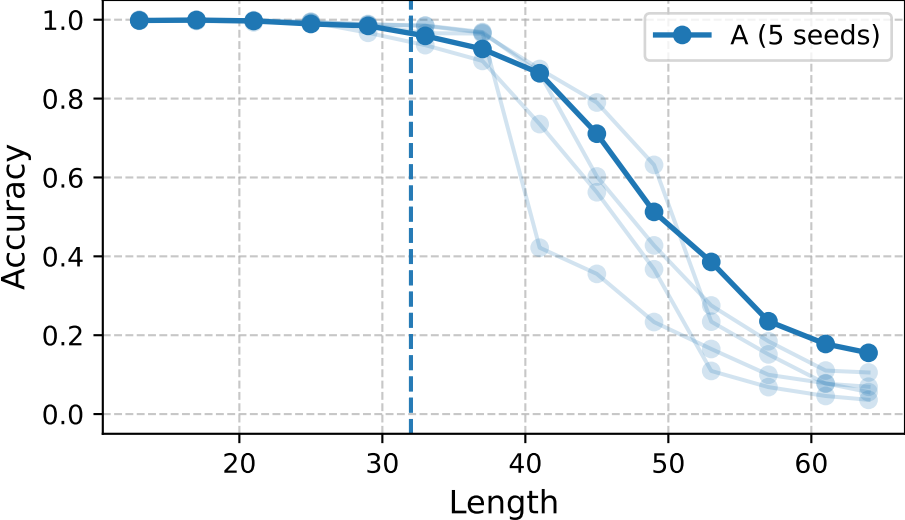

Supplement: supplementary_material [file maze-nano-llama.pdf › arithmetic-rl-release/notebooks/plots/maze/maze-nano-llama.pdf]

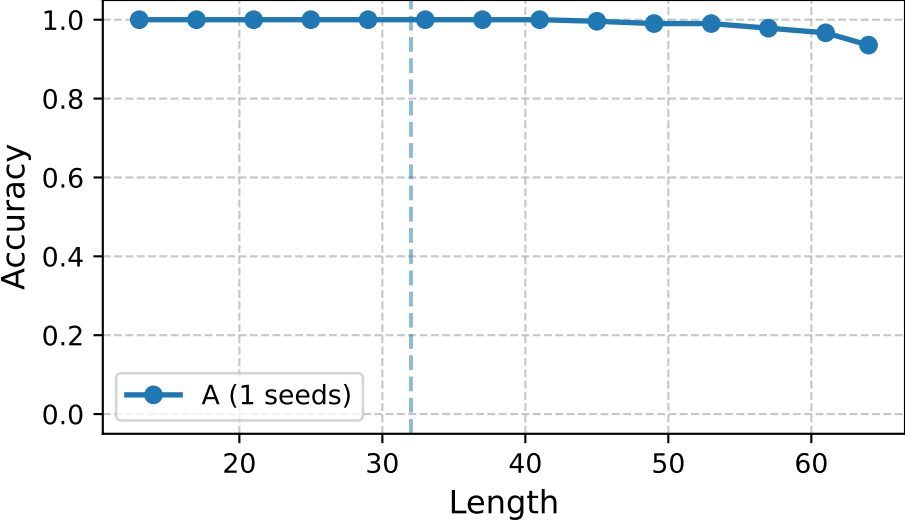

Supplement: supplementary_material [file maze-scaling.pdf › arithmetic-rl-release/notebooks/plots/maze/maze-scaling.pdf]

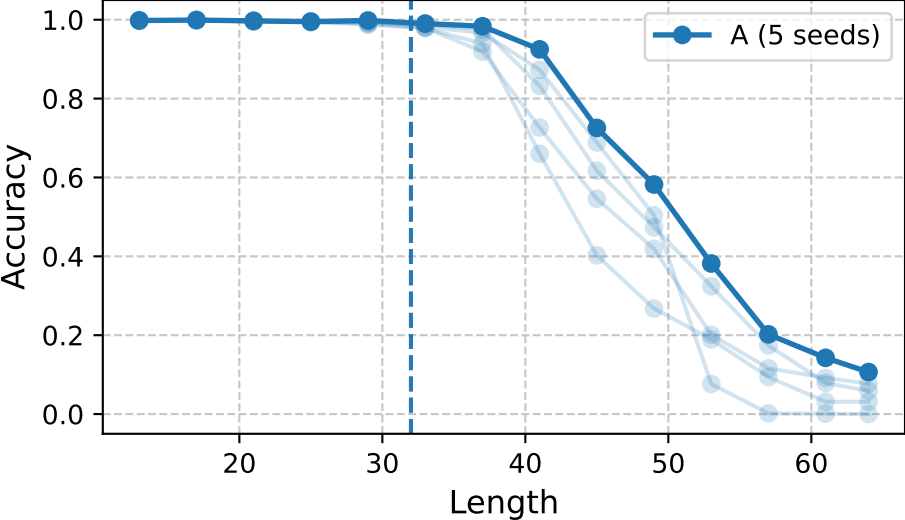

Supplement: supplementary_material [file maze_dfs-nano-llama.pdf › arithmetic-rl-release/notebooks/plots/maze/maze_dfs-nano-llama.pdf]

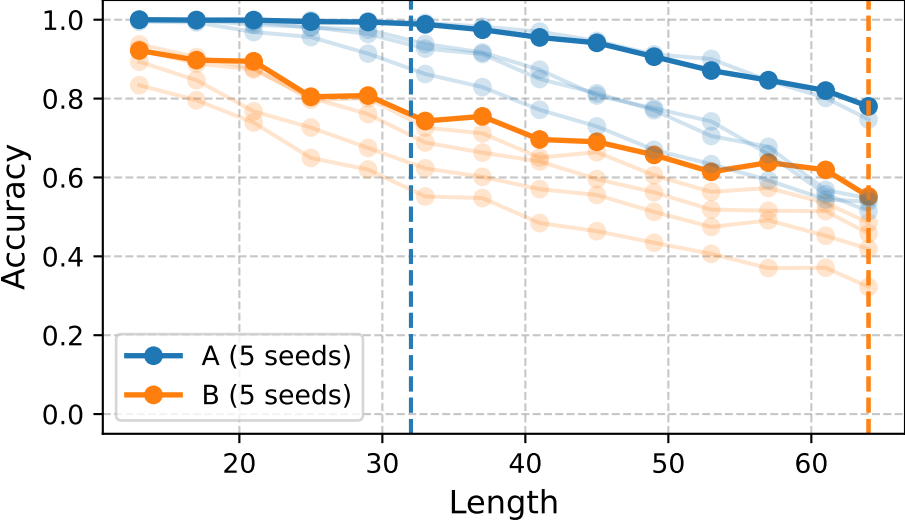

Supplement: supplementary_material [file maze_dfs_sp-nano-llama.pdf › arithmetic-rl-release/notebooks/plots/maze/maze_dfs_sp-nano-llama.pdf]

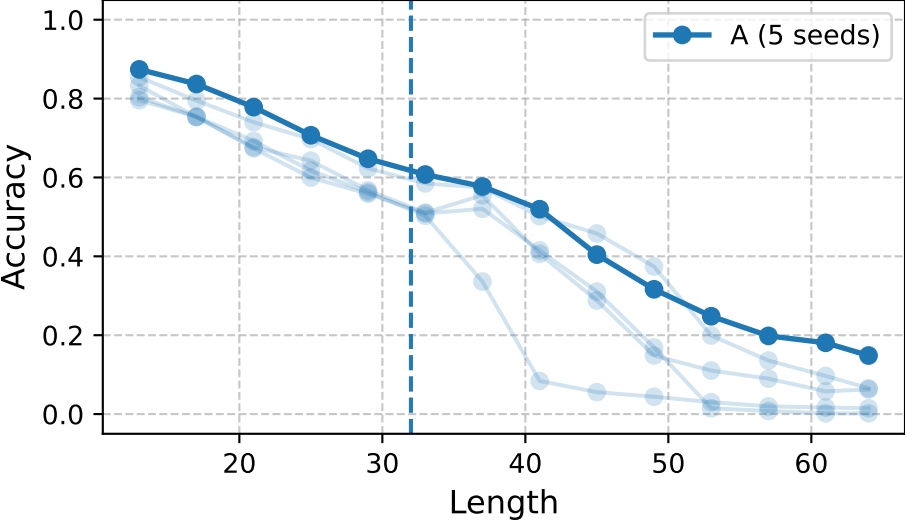

Supplement: supplementary_material [file maze_sp-nano-llama.pdf › arithmetic-rl-release/notebooks/plots/maze/maze_sp-nano-llama.pdf]

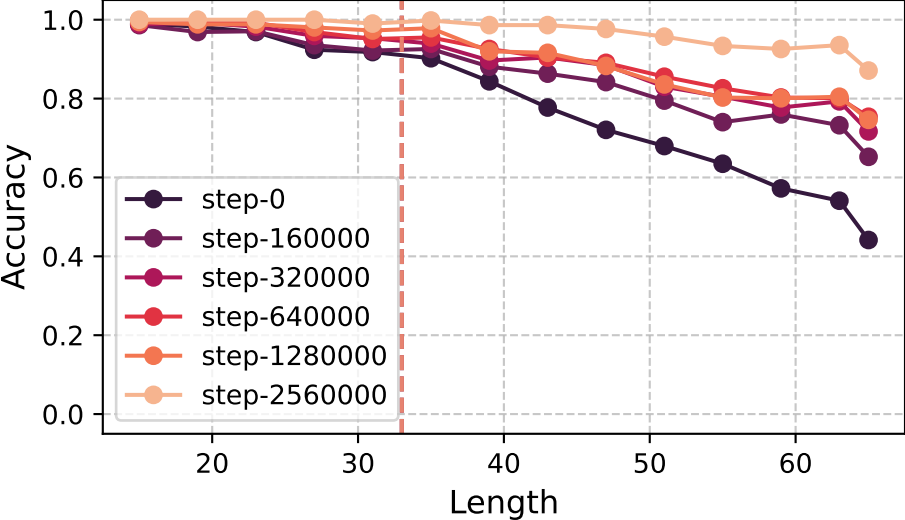

Supplement: supplementary_material [file maze_sp-scaling-config.revision.pdf › arithmetic-rl-release/notebooks/plots/maze/maze_sp-scaling-config.revision.pdf]

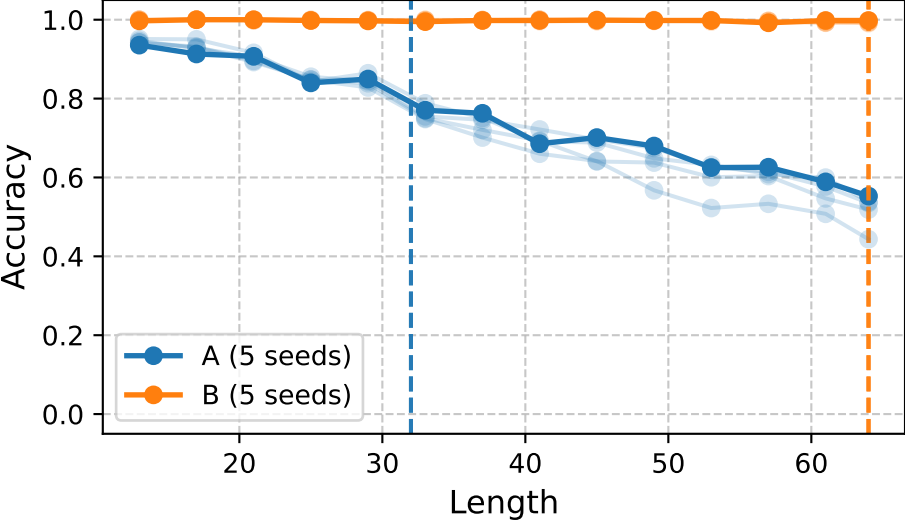

Supplement: supplementary_material [file maze_sp_dfs-nano-llama.pdf › arithmetic-rl-release/notebooks/plots/maze/maze_sp_dfs-nano-llama.pdf]

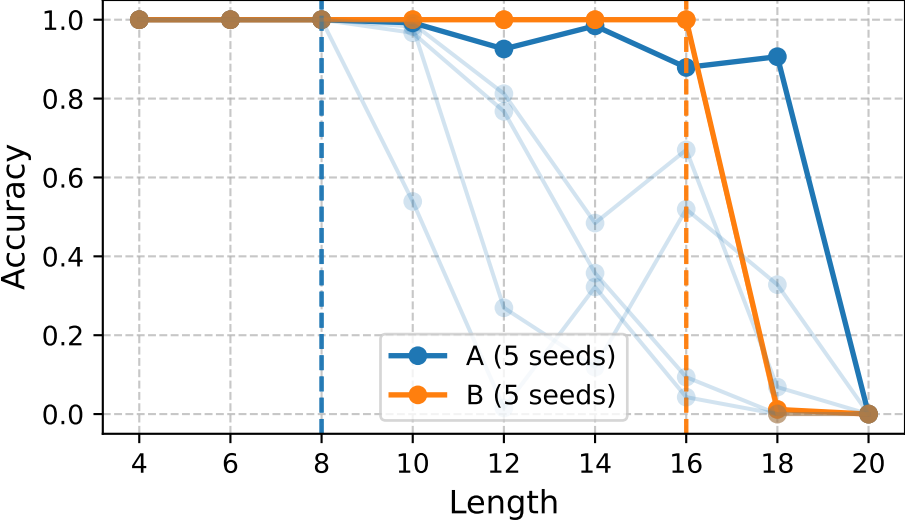

Supplement: supplementary_material [file reverse_mult_reverse_add-nano-llama.pdf › arithmetic-rl-release/notebooks/plots/mult/reverse_mult_reverse_add-nano-llama.pdf]

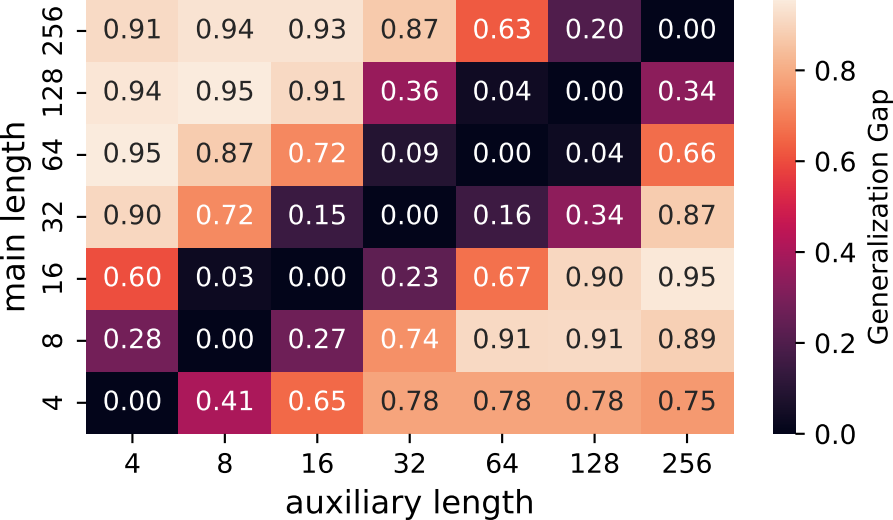

Supplement: supplementary_material [file scaling.pdf › arithmetic-rl-release/notebooks/plots/scaling.pdf]

training\_curve\_47

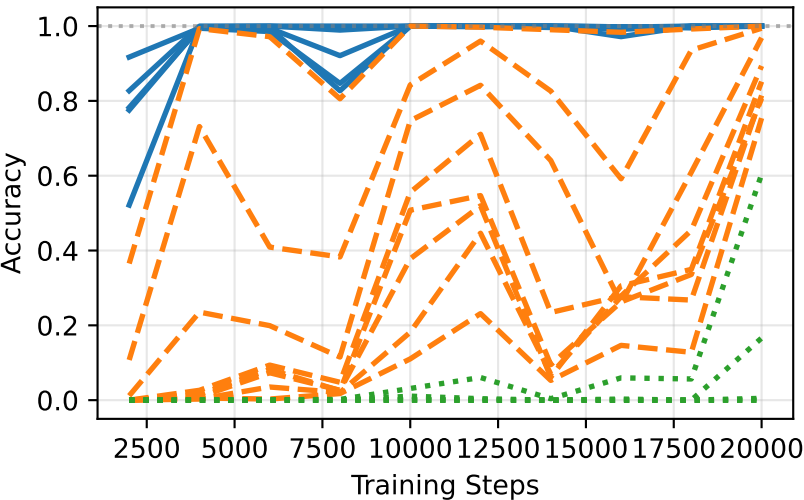

- In-Distribution (len ≤ 16)
- - - Unseen len by main (16 < len ≤ 32)
- ... Unseen len by both main & aux (len > 32)

Supplement: supplementary_material [file training_curve_47_full.pdf › arithmetic-rl-release/notebooks/plots/training_curve_47_full.pdf]

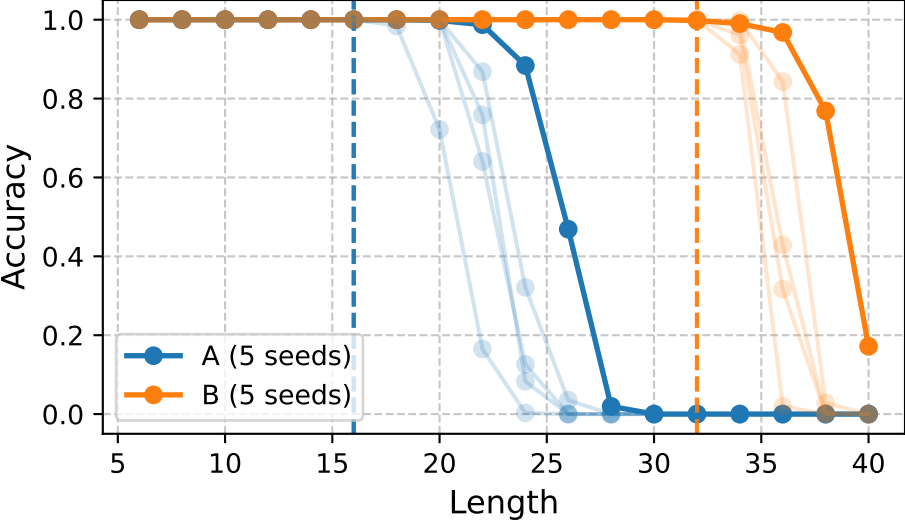

Supplement: supplementary_material [file no_carry-nano-llama.pdf › arithmetic-rl-release/notebooks/plots_nope/addition/no_carry-nano-llama.pdf]

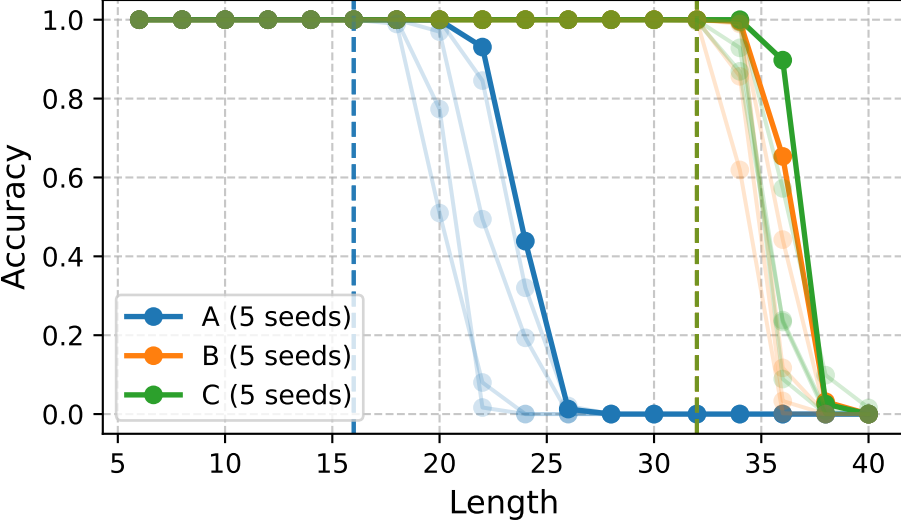

Supplement: supplementary_material [file no_carry_only_carry-nano-llama.pdf › arithmetic-rl-release/notebooks/plots_nope/addition/no_carry_only_carry-nano-llama.pdf]

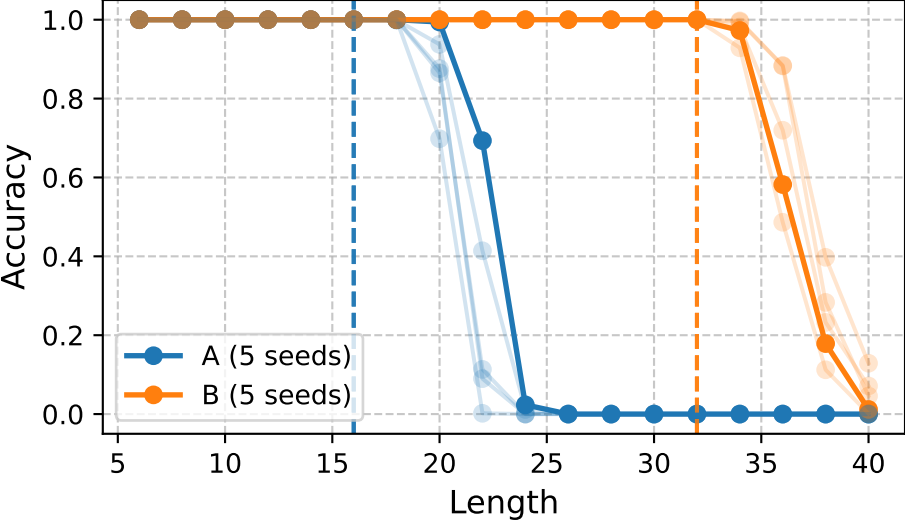

Supplement: supplementary_material [file only_carry-nano-llama.pdf › arithmetic-rl-release/notebooks/plots_nope/addition/only_carry-nano-llama.pdf]

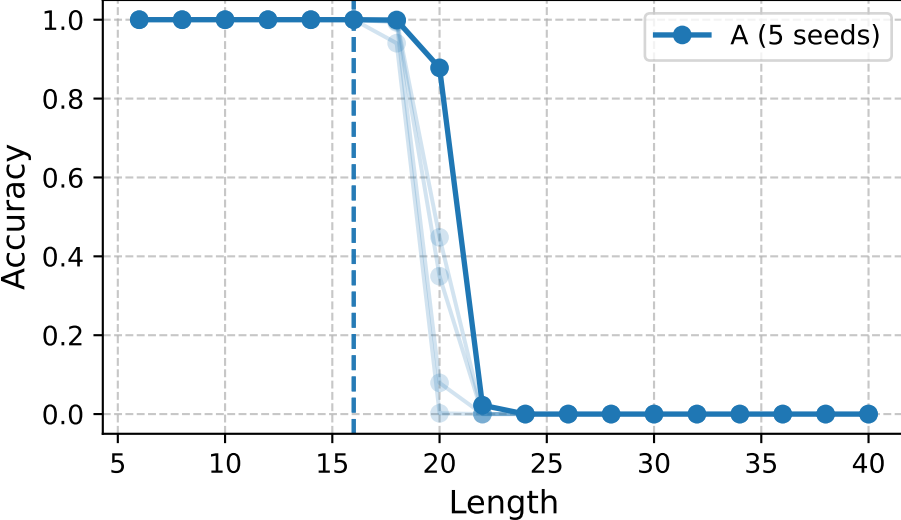

Supplement: supplementary_material [file reverse_add-nano-llama.pdf › arithmetic-rl-release/notebooks/plots_nope/addition/reverse_add-nano-llama.pdf]

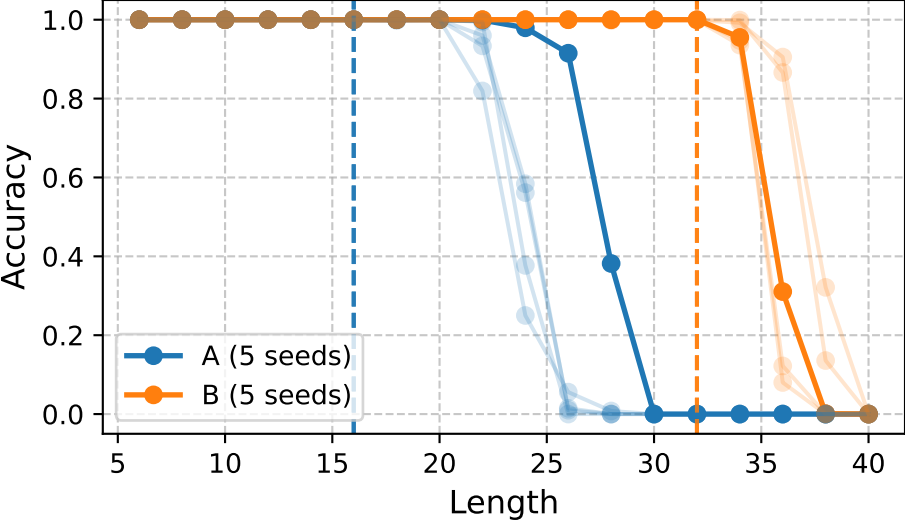

Supplement: supplementary_material [file reverse_add_trans-nano-llama.pdf › arithmetic-rl-release/notebooks/plots_nope/addition/reverse_add_trans-nano-llama.pdf]

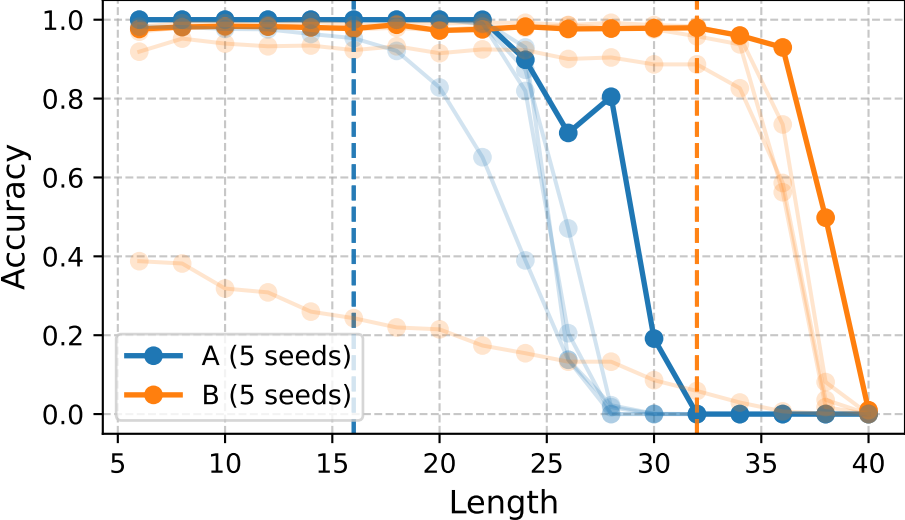

Supplement: supplementary_material [file reverse_sub-nano-llama.pdf › arithmetic-rl-release/notebooks/plots_nope/addition/reverse_sub-nano-llama.pdf]

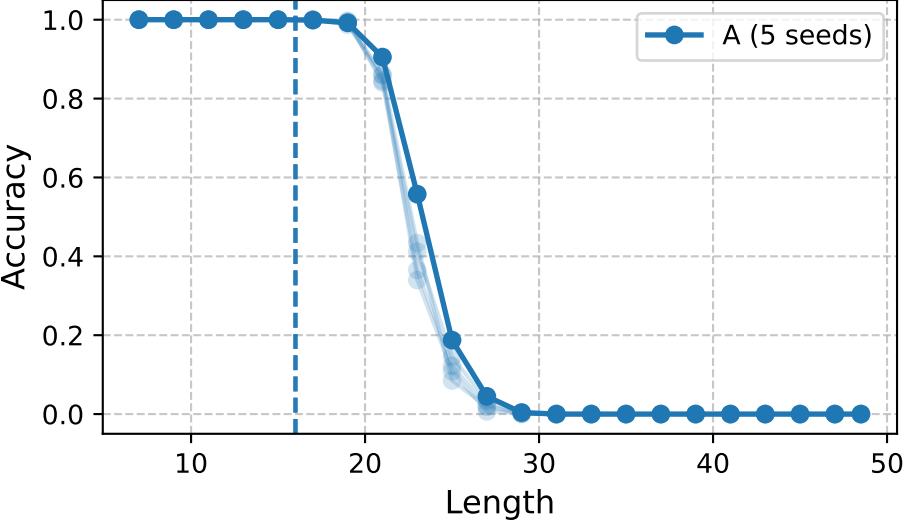

Supplement: supplementary_material [file copy-nano-llama.pdf › arithmetic-rl-release/notebooks/plots_nope/copy/copy-nano-llama.pdf]

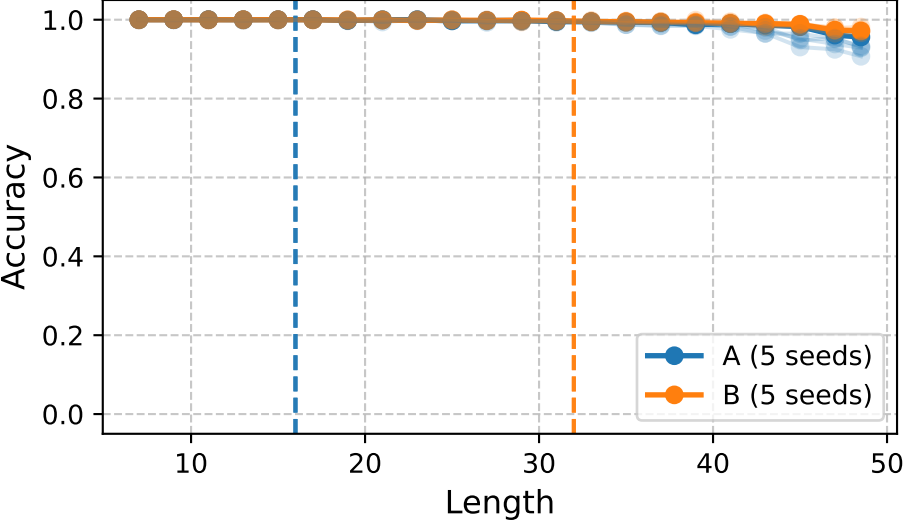

Supplement: supplementary_material [file copy_MQAR-nano-llama.pdf › arithmetic-rl-release/notebooks/plots_nope/copy/copy_MQAR-nano-llama.pdf]

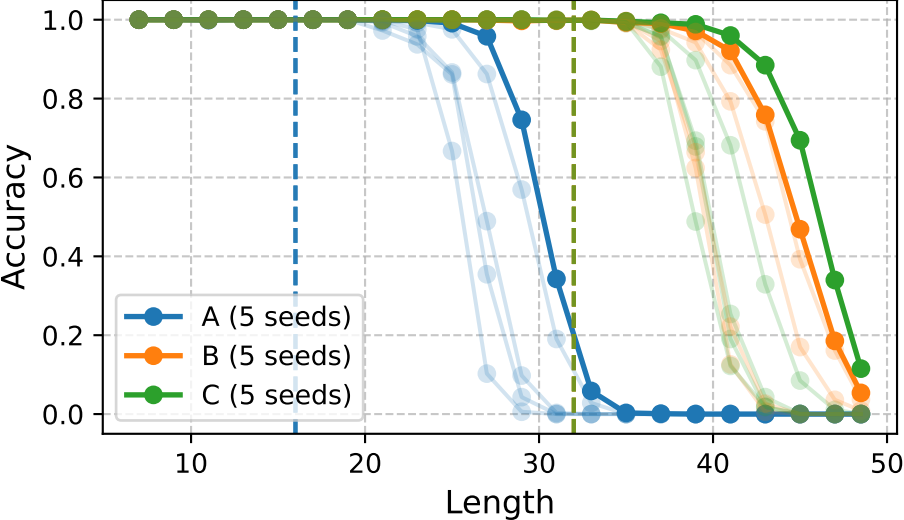

Supplement: supplementary_material [file copy_capitalize_reverse-nano-llama.pdf › arithmetic-rl-release/notebooks/plots_nope/copy/copy_capitalize_reverse-nano-llama.pdf]

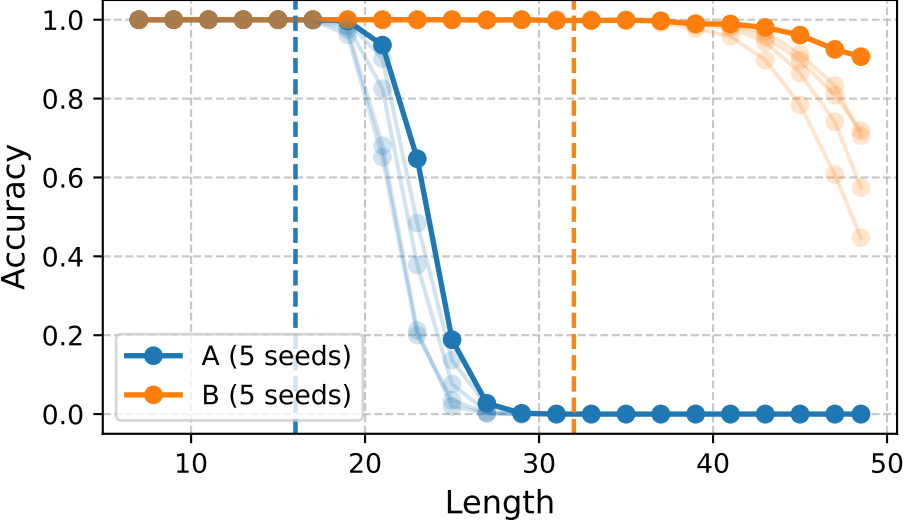

Supplement: supplementary_material [file copy_reverse-nano-llama.pdf › arithmetic-rl-release/notebooks/plots_nope/copy/copy_reverse-nano-llama.pdf]

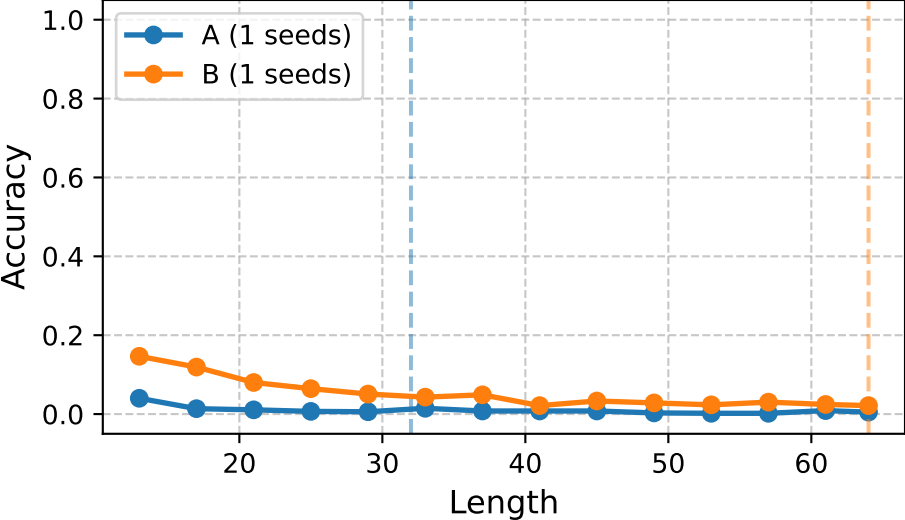

Supplement: supplementary_material [file maze_dfs-nano-llama.pdf › arithmetic-rl-release/notebooks/plots_nope/maze/maze_dfs-nano-llama.pdf]

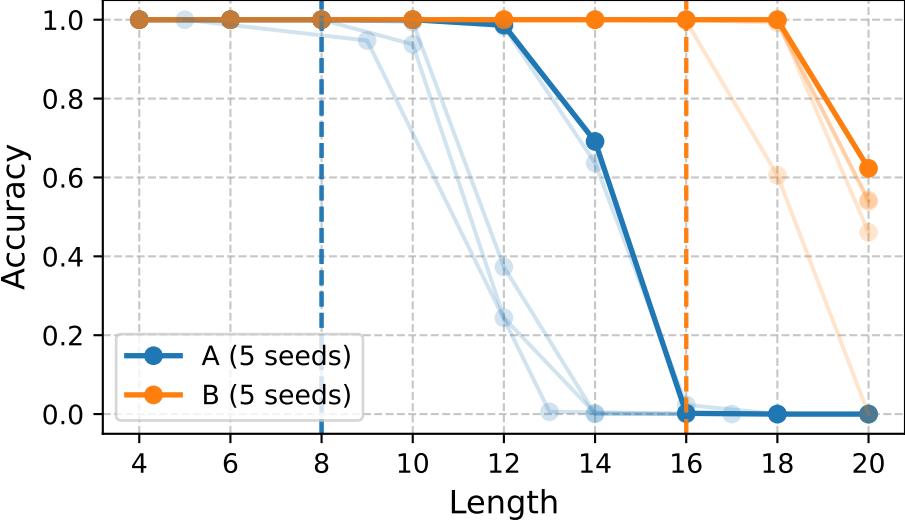

Supplement: supplementary_material [file reverse_mult_reverse_add-nano-llama.pdf › arithmetic-rl-release/notebooks/plots_nope/mult/reverse_mult_reverse_add-nano-llama.pdf]
